# Supplementary material for: Asymmetric Michael addition of ketones to nitroolefins: pyrrolidinyl-oxazole-carboxamides as new efficient organocatalysts
Source: Royal Society of Chemistry journal article supplement (doi:10.1039/c4ob01223b), 2014-01-01
Supplement: c4ob01223b1.pdf [file c4ob01223b1.pdf]

## Supporting Information

### Asymmetric Michael addition of ketones to nitroolefins: Pyrrolidinyl-oxazole-carboxamides as new efficient organocatalysts

Ahmed Kamal,<sup>\*a,b</sup> Manda Sathish,<sup>a</sup> Vunnam Srinivasulu,<sup>a</sup> Jadala Chetna,<sup>b</sup> Kunta Chandra Shekar,<sup>a</sup> Shalini Nekkanti,<sup>b</sup> Yellaiah Tangella<sup>a</sup> and Nagula Shankaraiah<sup>b</sup>

<sup>a</sup>*Medicinal Chemistry & Pharmacology, CSIR-Indian Institute of Chemical Technology, Hyderabad 500 007, India*

<sup>b</sup>*Department of Medicinal Chemistry, National Institute of Pharmaceutical Education and Research (NIPER), Hyderabad-500 037, India*

#### List of Contents

|                                                                   |         |
|-------------------------------------------------------------------|---------|
| Transition state models                                           | S2      |
| <sup>1</sup> H and <sup>13</sup> C NMR, HRMS and IR spectral data | S3-S40  |
| HPLC Chromatograms                                                | S40-S53 |

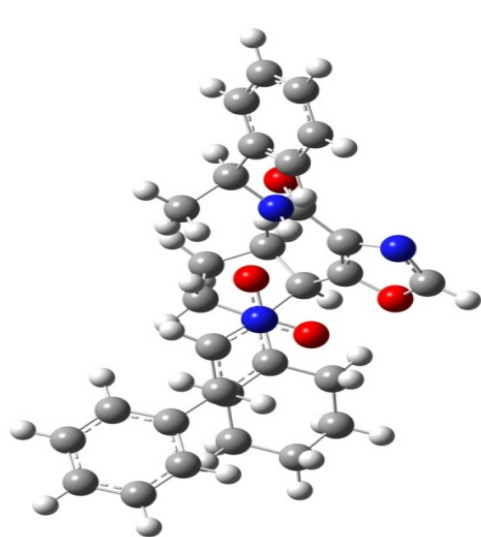

**anti-SRts**

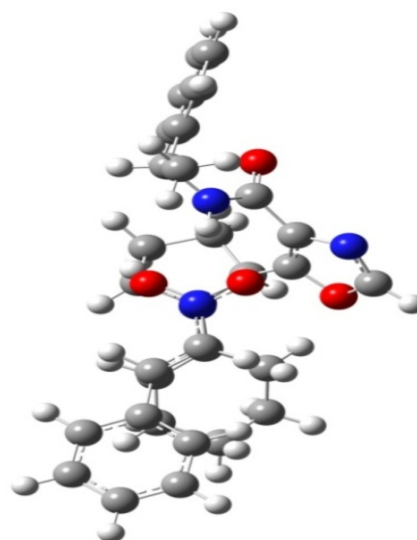

**anti-SSts**

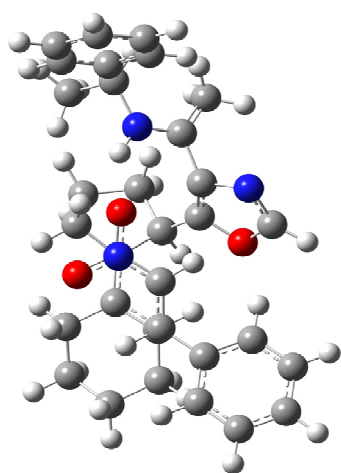

**Syn-RRts**

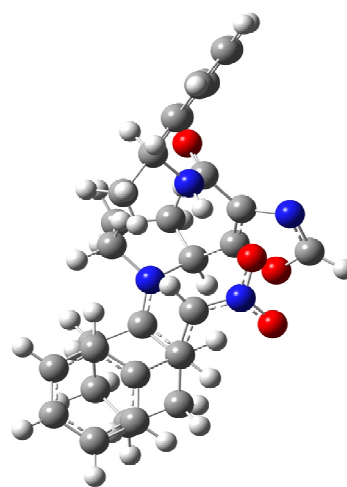

**Syn-RSts**

$^1\text{H}$  NMR spectra of **8**

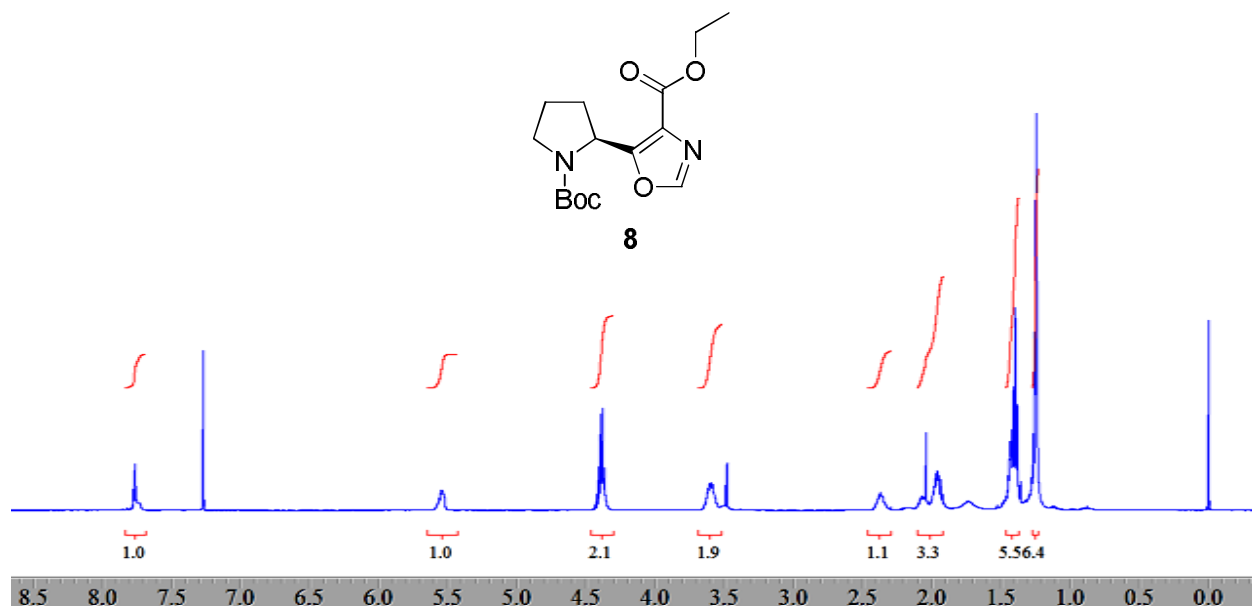

$^{13}\text{C}$  NMR spectra of **8**

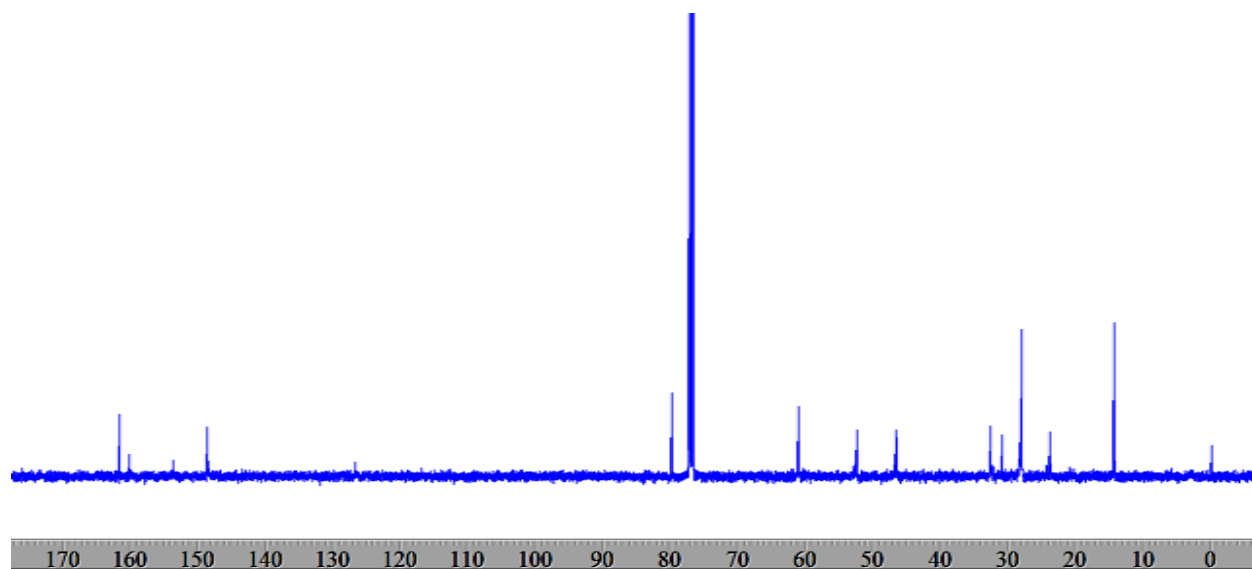

## HRMS spectra of **8**

AKL-OXO-ESTR#6-89 RT: 0.02-0.30 AV: 84 SB: 326 0.80-1.90 NL: 8.46E7  
T: FTMS (1,1) + p ESI Full ms [150.00-2000.00]

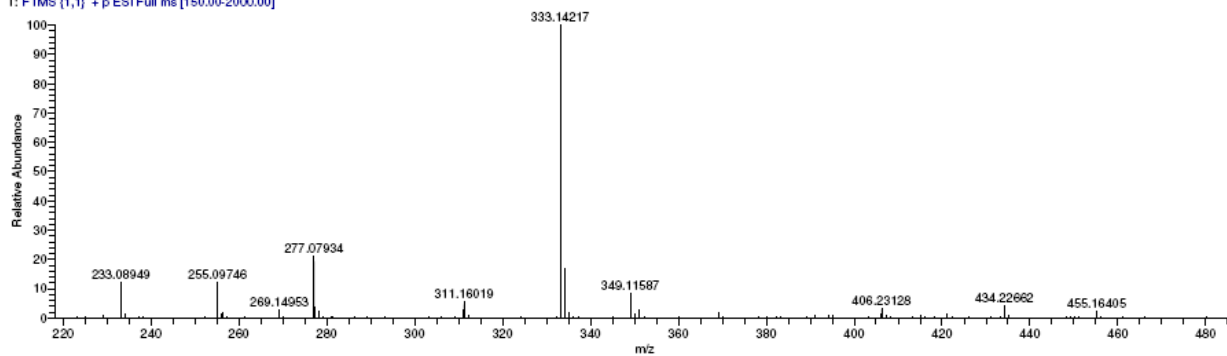

AKL-OXO-ESTR#8-30 RT: 0.03-0.10 AV: 23

T: FTMS (1,1) + p ESI Full ms [150.00-2000.00]

m/z= 303.80-371.90

| m/z       | Intensity | Relative | Theo. Mass | Delta (ppm) | RDB equiv. | Composition                                                      |
|-----------|-----------|----------|------------|-------------|------------|------------------------------------------------------------------|
| 333.14222 | 8919331.0 | 100.00   | 333.14209  | 0.13        | 5.5        | C <sub>15</sub> H <sub>22</sub> O <sub>5</sub> N <sub>2</sub> Na |

## IR spectra of **8**

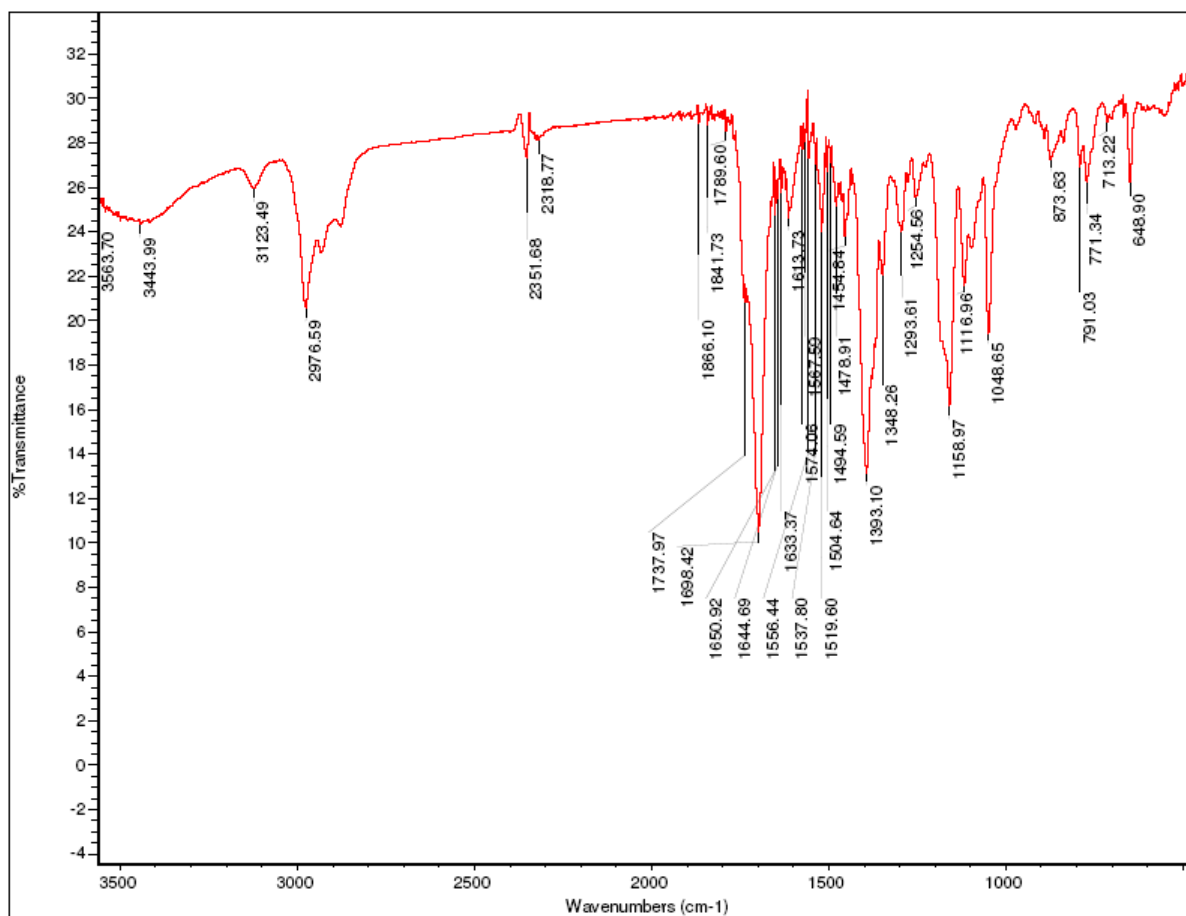

$^1\text{H}$  NMR spectra of **9**

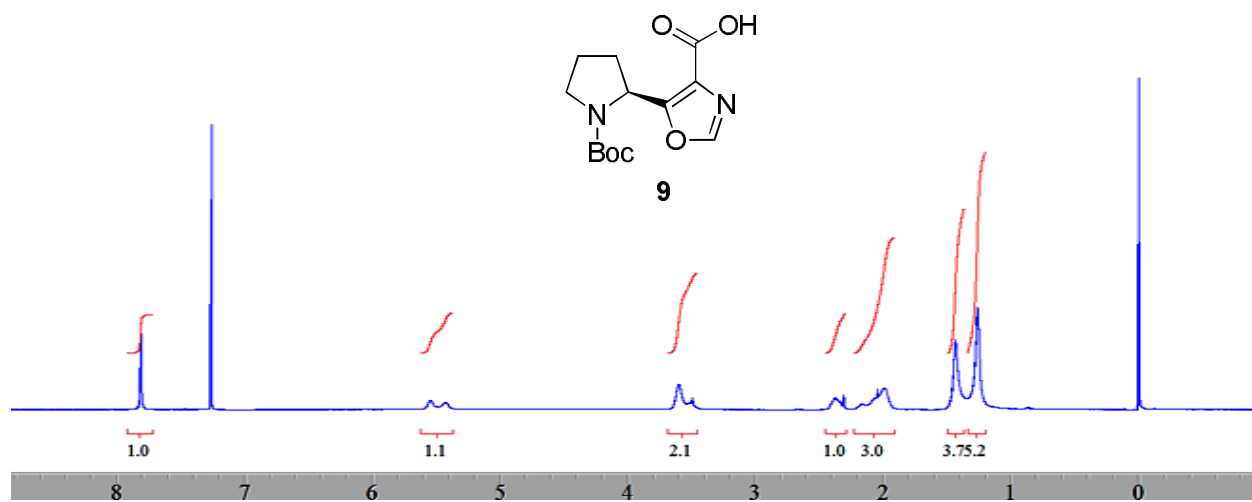

$^{13}\text{C}$  NMR spectra of **9**

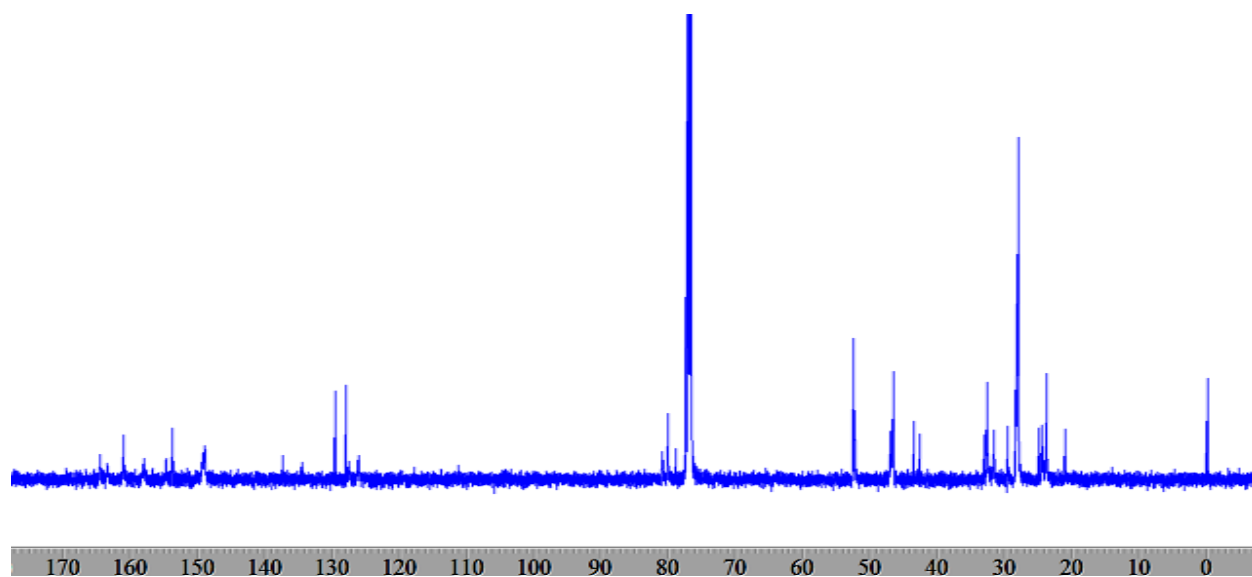

## HRMS spectra of 9

AKL-OXO-ACID#8-89 RT: 0.02-0.30 AV: 84 SB: 326 0.80-1.90 NL: 5.71E7  
 T: FTMS (1,1) + p ESI Full ms [150.00-2000.00]

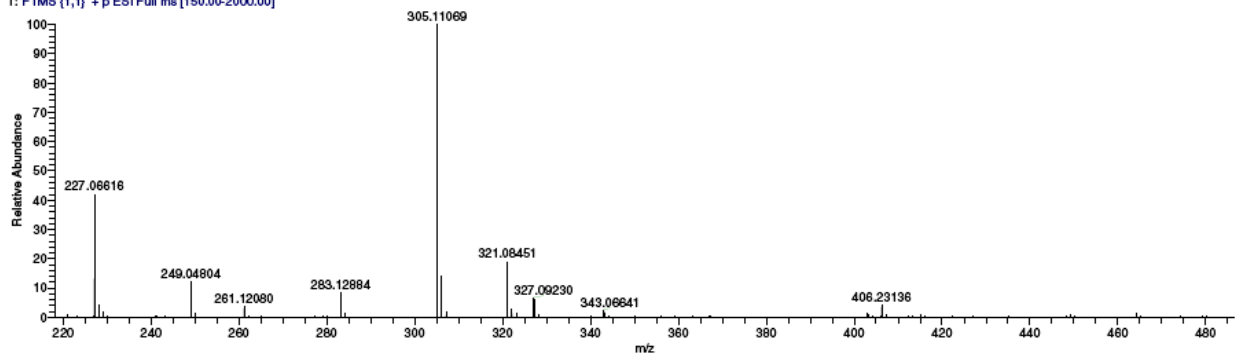

AKL-OXO-ACID#8-30 RT: 0.03-0.10 AV: 23  
 T: FTMS (1,1) + p ESI Full ms [150.00-2000.00]

m/z = 295.05-313.78

| m/z       | Intensity | Relative | Theo. Mass | Delta (ppm) | RDB equiv. | Composition                                                      |
|-----------|-----------|----------|------------|-------------|------------|------------------------------------------------------------------|
| 305.11088 | 2829458.3 | 100.00   | 305.11079  | 0.09        | 5.5        | C <sub>13</sub> H <sub>18</sub> O <sub>5</sub> N <sub>2</sub> Na |

## IR spectra of 9

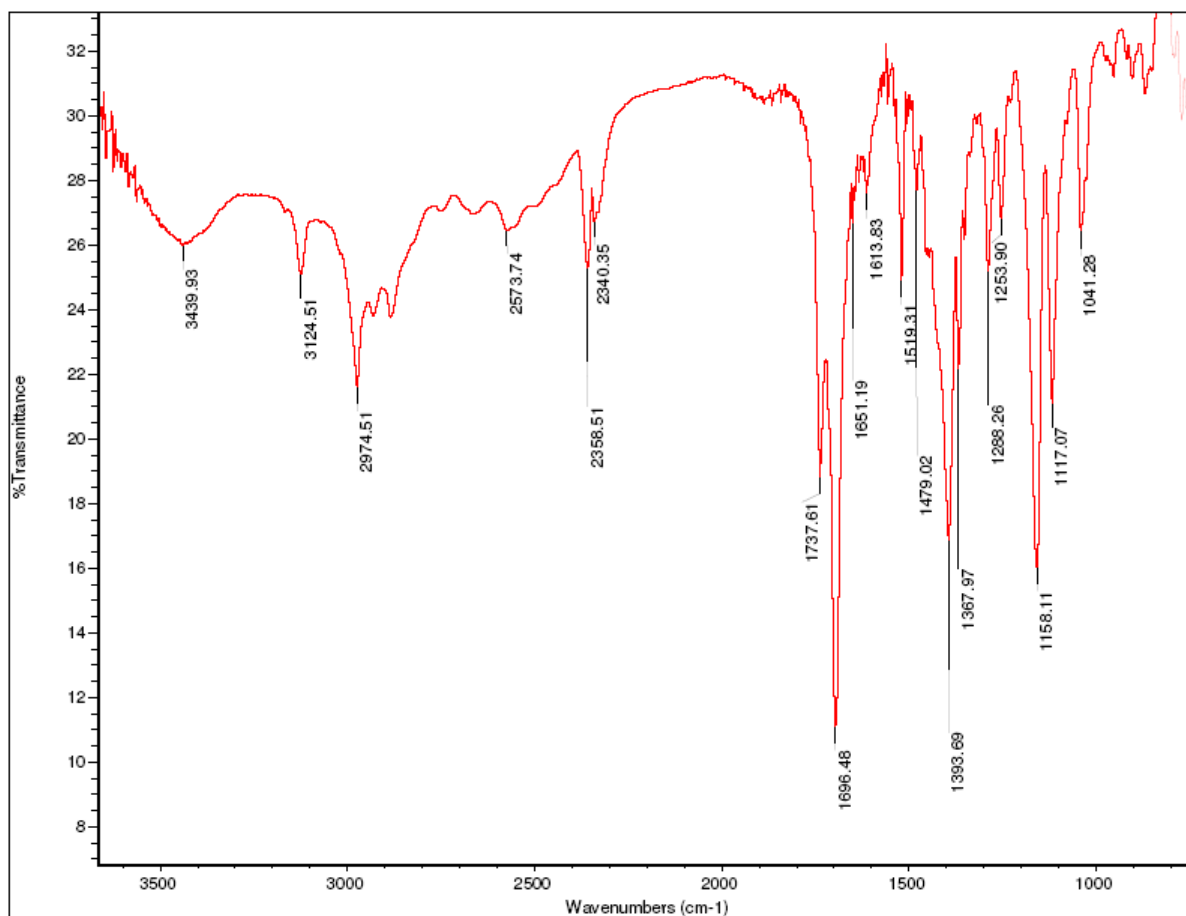

$^1\text{H}$  NMR spectra of **10a**

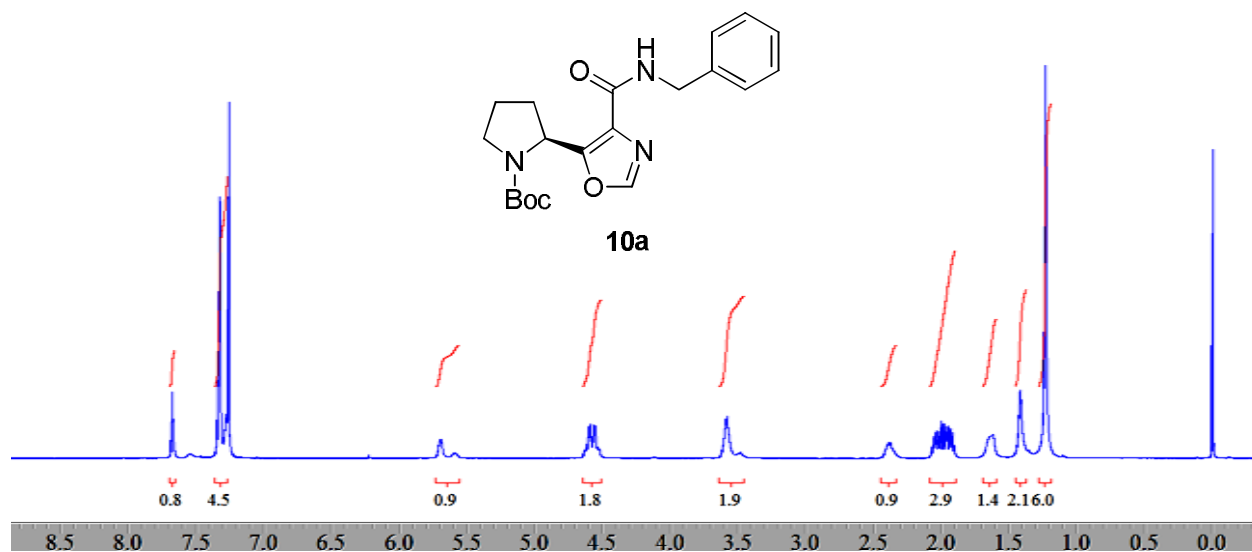

$^{13}\text{C}$  NMR spectra of **10a**

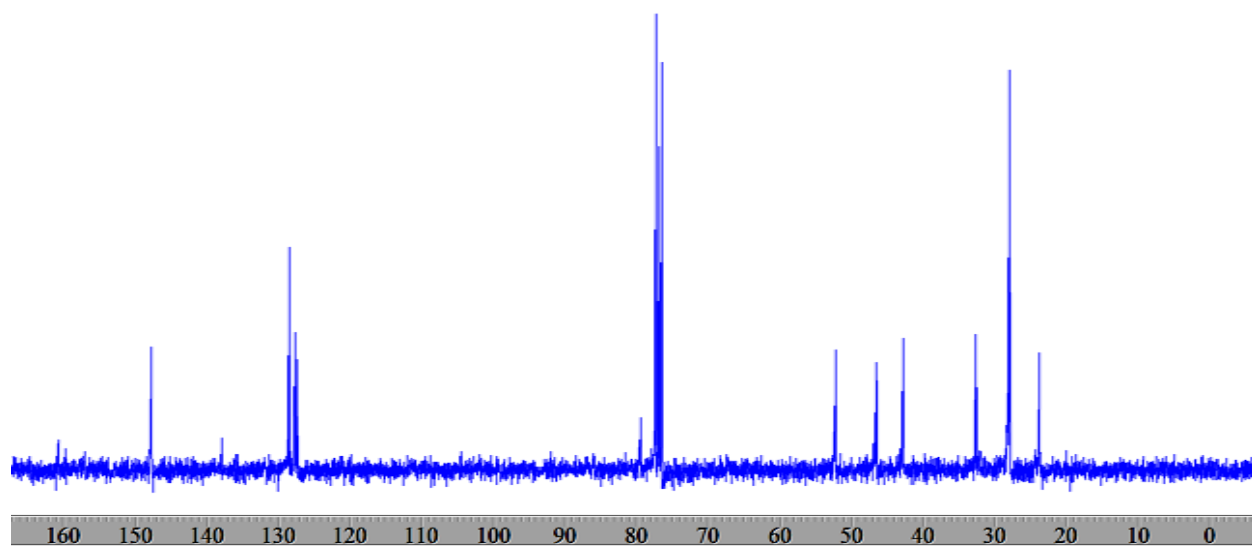

## HRMS spectra of 10a

AKL-BOC-BN#2-111 RT: 0.01-0.38 AV: 110 SB: 377 0.73-2.00 NL: 1.52E7  
T: FTMS (1,1) + p ESI Full ms [100.00-2000.00]

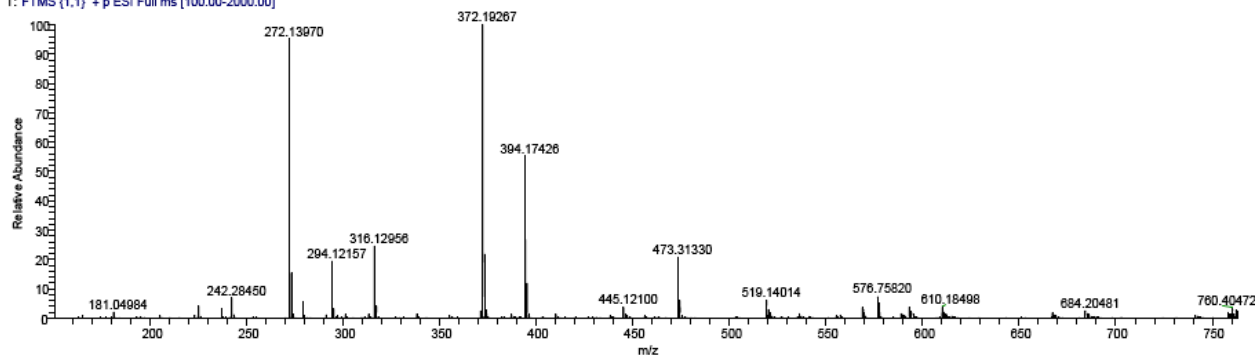

AKL-BOC-BN#8-30 RT: 0.03-0.11 AV: 23  
T: FTMS (1,1) + p ESI Full ms [100.00-2000.00]

| m/z       | Intensity  | Relative | Theo. Mass | Delta (ppm) | RDB equiv. | Composition                                                   |
|-----------|------------|----------|------------|-------------|------------|---------------------------------------------------------------|
| 272.13966 | 40724564.0 | 96.94    |            |             |            |                                                               |
| 372.19258 | 42008388.0 | 100.00   | 372.19178  | 2.14        | 9.5        | C <sub>20</sub> H <sub>26</sub> O <sub>4</sub> N <sub>3</sub> |

## IR spectra of 10a

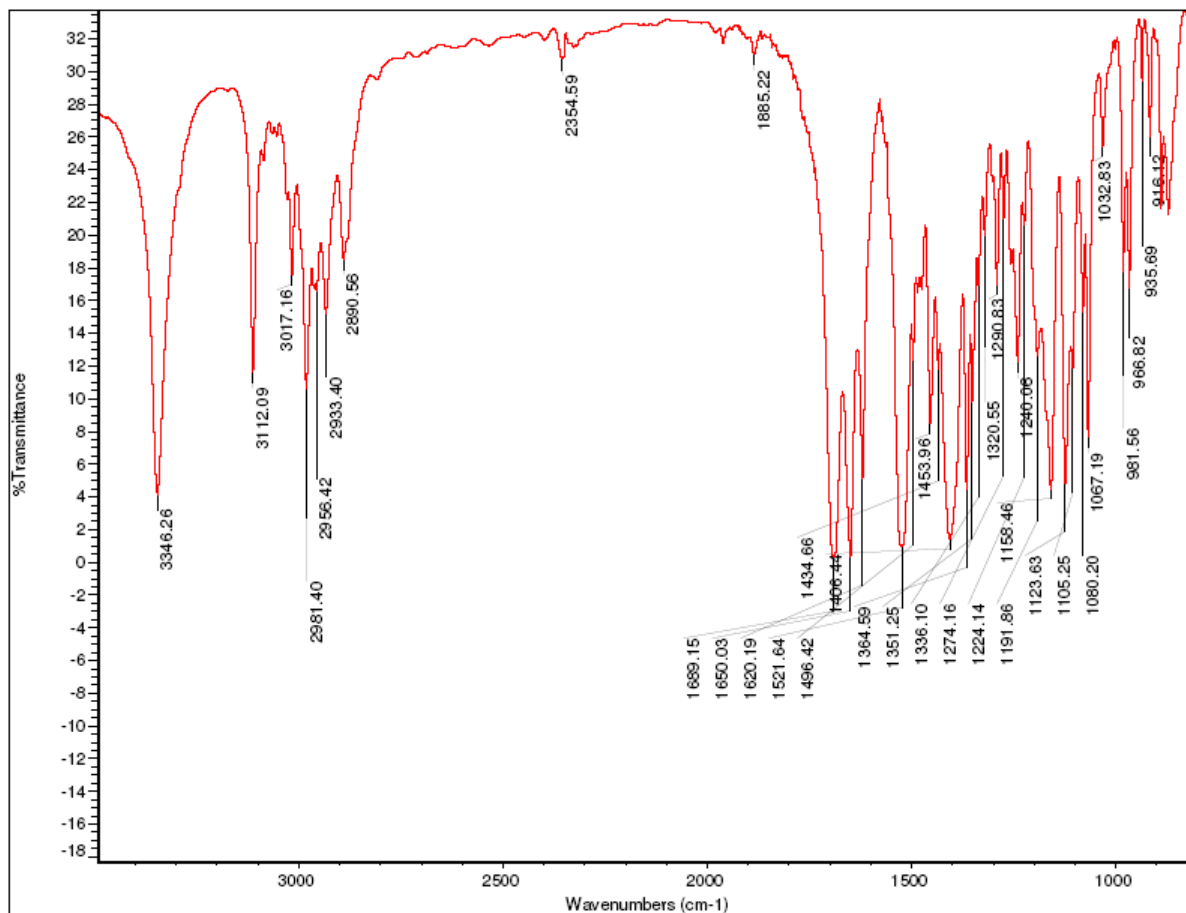



$^1\text{H}$  NMR spectra of **10b**

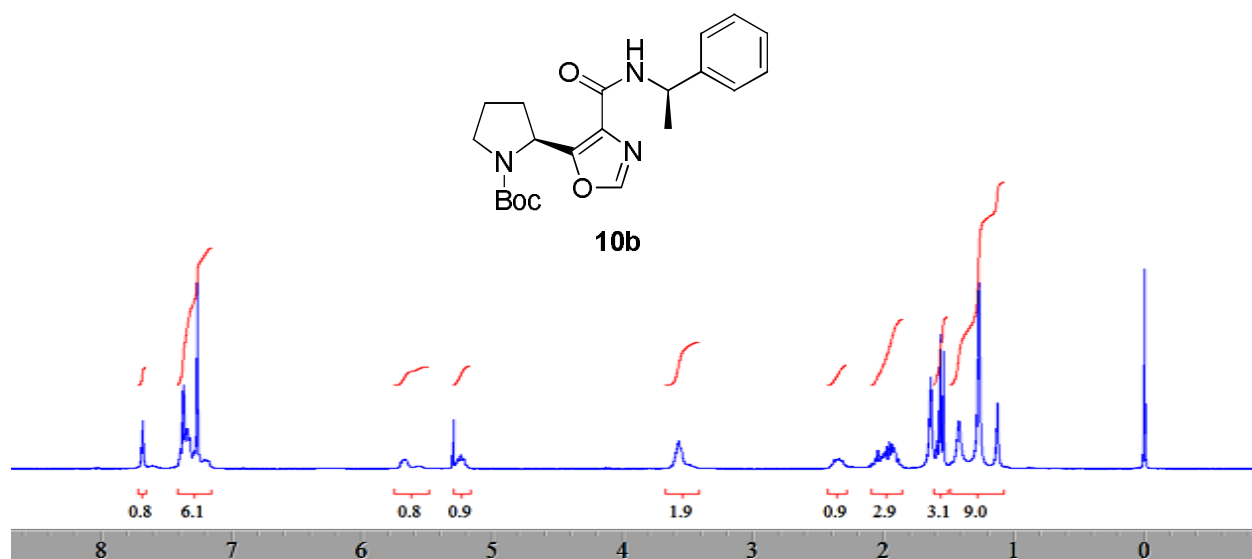

$^{13}\text{C}$  NMR spectra of **10b**

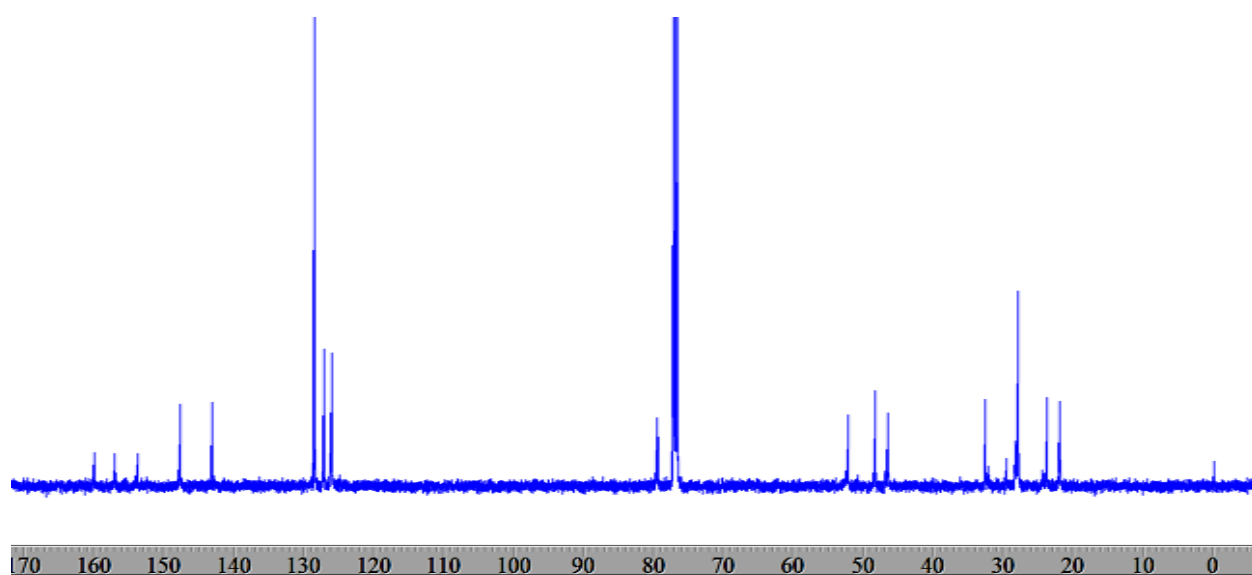

## HRMS spectra of 10b

AKL-BOC-R-ME#3-112 RT: 0.01-0.38 AV: 110 SB: 376 0.73-2.00 NL: 1.49E7  
T: FTMS (1,1) + p ESI Full ms [100.00-2000.00]

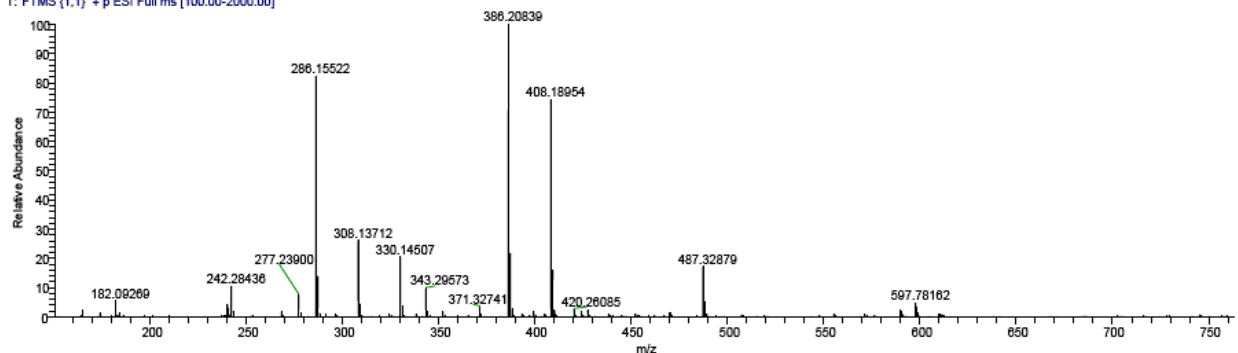

AKL-BOC-R-ME#8-30 RT: 0.03-0.11 AV: 23  
T: FTMS {1,1} + p ESI Full ms [100.00-2000.00]  
m/z = 400.97-415.85

| m/z       | Intensity  | Relative | Theo. Mass | Delta (ppm) | RDB equiv. | Composition                                                      |
|-----------|------------|----------|------------|-------------|------------|------------------------------------------------------------------|
| 408.18945 | 30435216.0 | 100.00   | 408.18938  | 0.17        | 9.5        | C <sub>21</sub> H <sub>27</sub> O <sub>4</sub> N <sub>3</sub> Na |
| 409.19290 | 6502653.5  | 21.37    |            |             |            |                                                                  |

## IR spectra of 10b

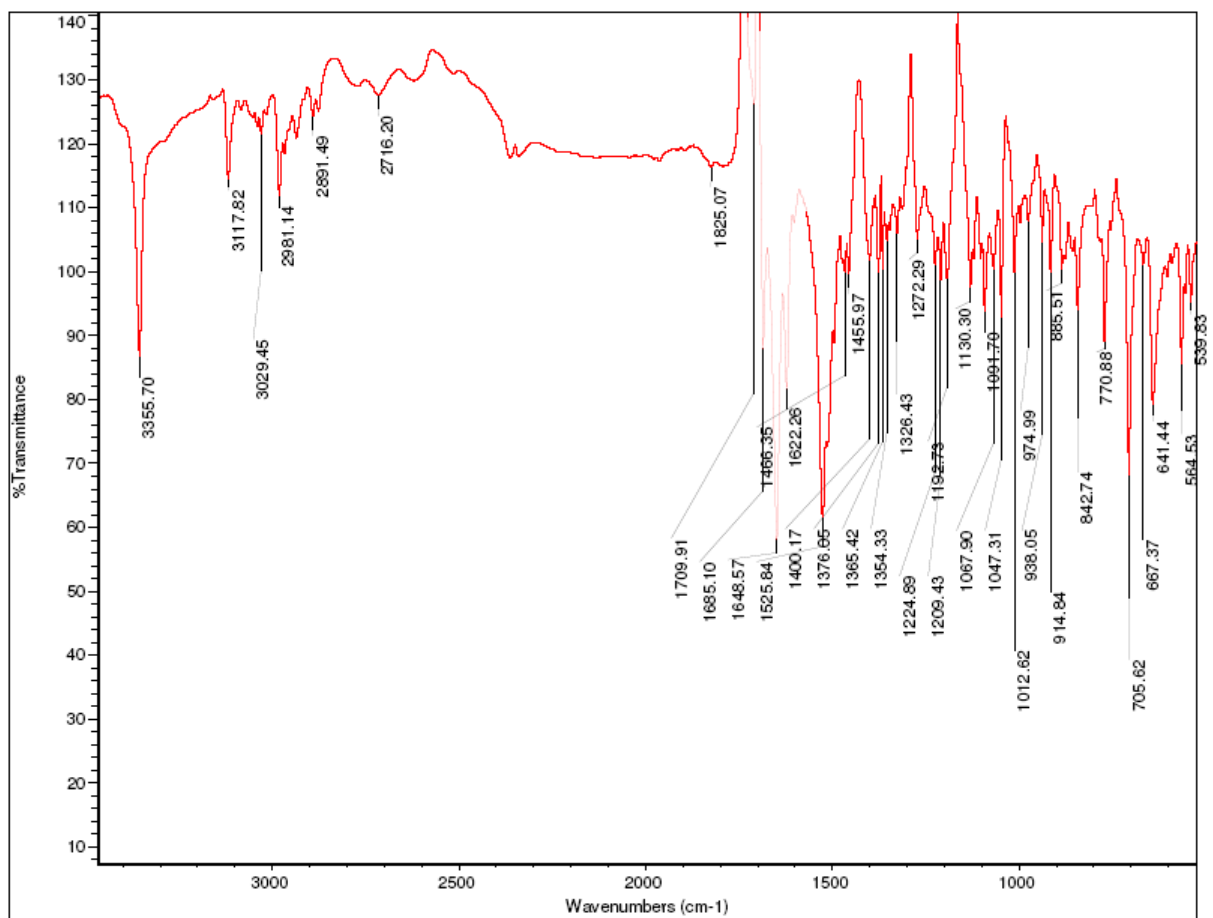

$^1\text{H}$  NMR spectra of **10c**

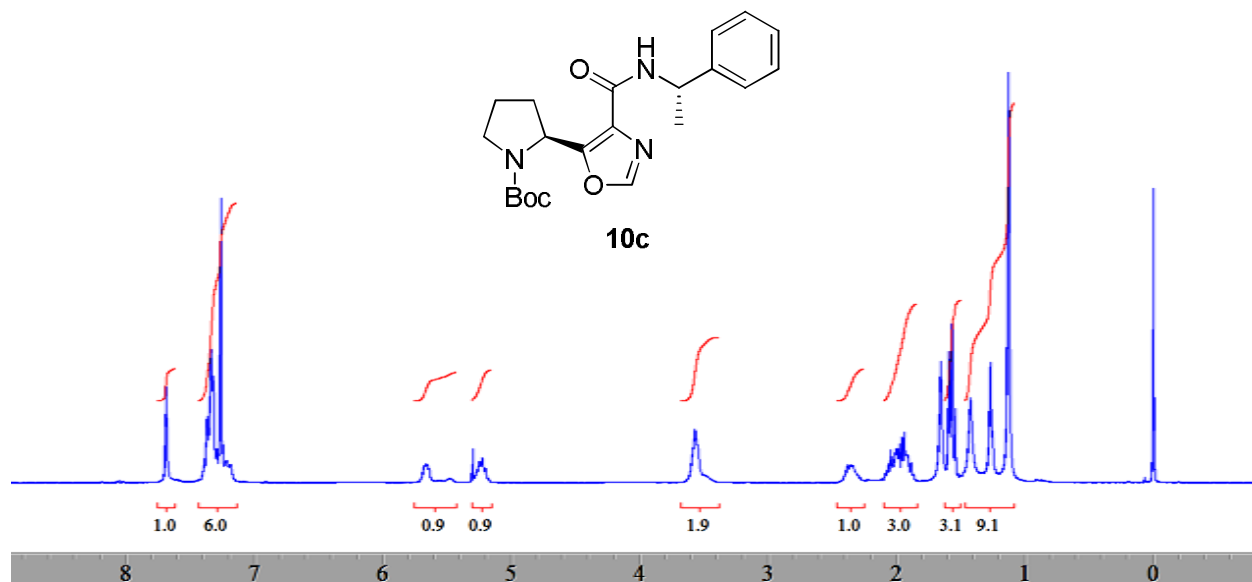

$^{13}\text{C}$  NMR spectra of **10c**

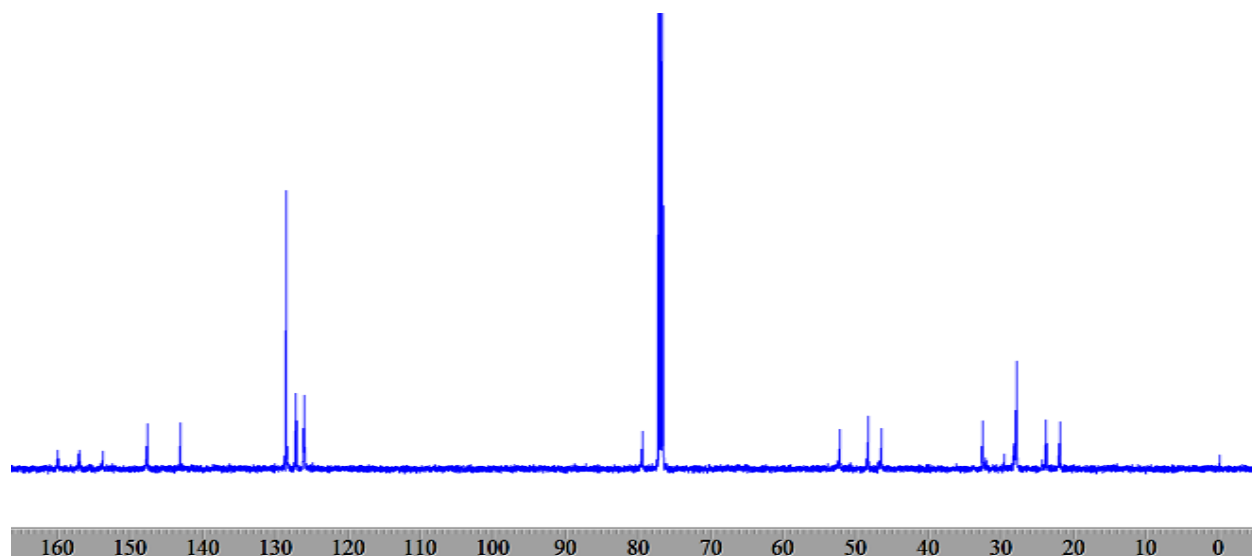

## HRMS spectra of 10c

AKL-BOC-S-ME#3-111 RT: 0.02-0.38 AV: 109 SB: 377 0.73-2.00 NL: 8.97E6  
T: FTMS (1,1) + p ESI Full ms [100.00-2000.00]

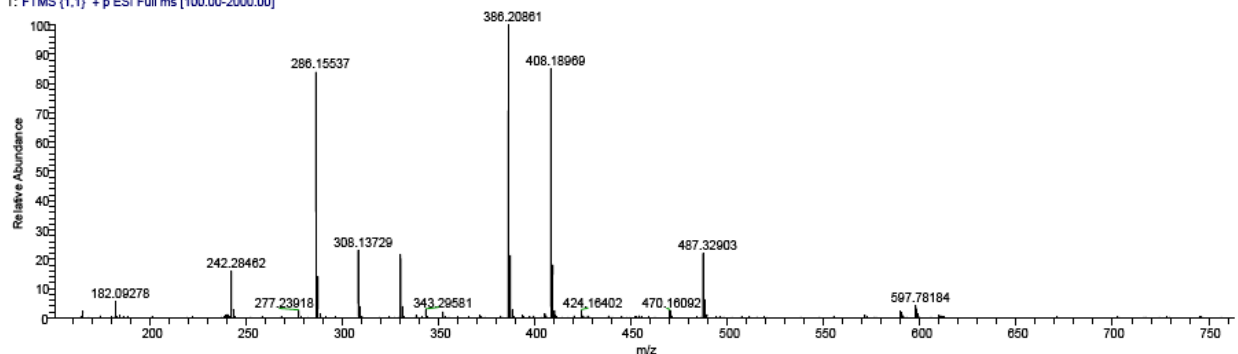

AKL-BOC-S-ME#8-30 RT: 0.03-0.11 AV: 23  
T: FTMS {1,1} + p ESI Full ms [100.00-2000.00]

| m/z       | Intensity  | Relative | Theo. Mass | Delta (ppm) | RDB equiv. | Composition                                                      |
|-----------|------------|----------|------------|-------------|------------|------------------------------------------------------------------|
| 386.20855 | 26210124.0 | 100.00   | 386.20743  | 2.89        | 9.5        | C <sub>21</sub> H <sub>28</sub> O <sub>4</sub> N <sub>3</sub>    |
| 408.18961 | 24608248.0 | 93.89    | 408.18938  | 0.57        | 9.5        | C <sub>21</sub> H <sub>27</sub> O <sub>4</sub> N <sub>3</sub> Na |

## IR spectra of 10c

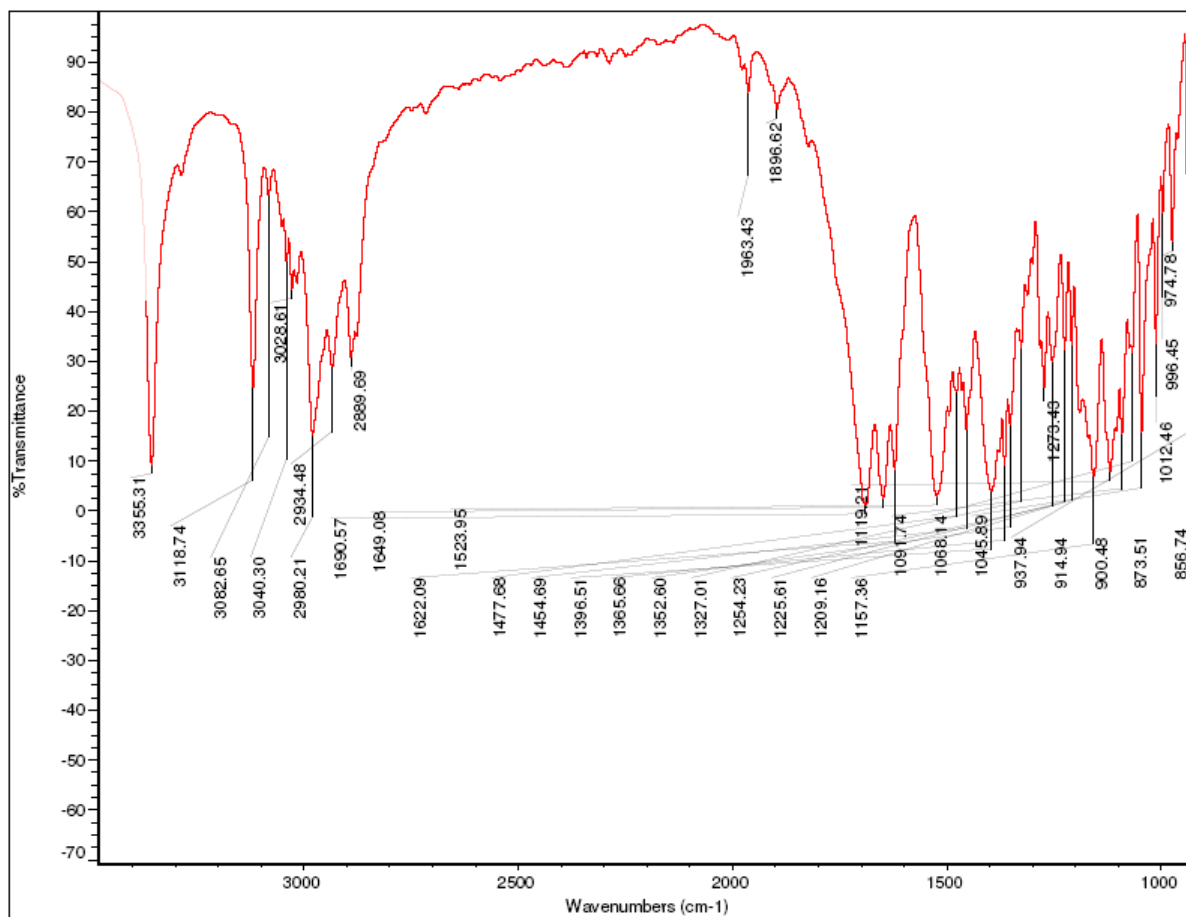

$^1\text{H}$  NMR spectra of **4**

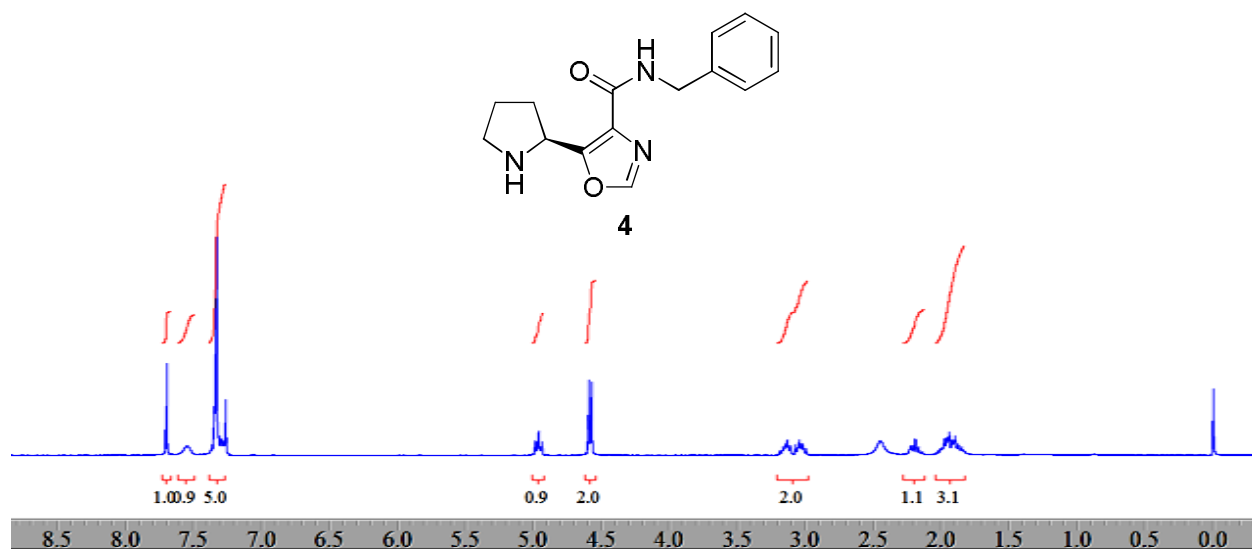

$^{13}\text{C}$  NMR spectra of **4**

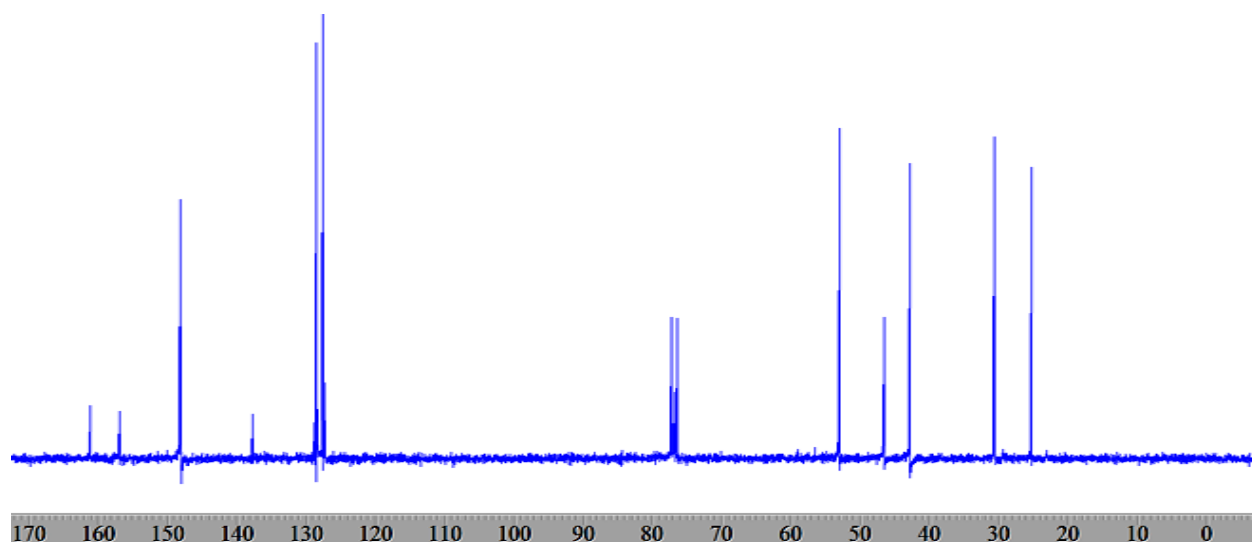

## HRMS spectra of 4

AKL-NH-BN#3-112 RT: 0.01-0.38 AV: 110 SB: 377 0.73-2.00 NL: 7.39E7  
T: FTMS (1,1) + p ESI Full ms [100.00-2000.00]

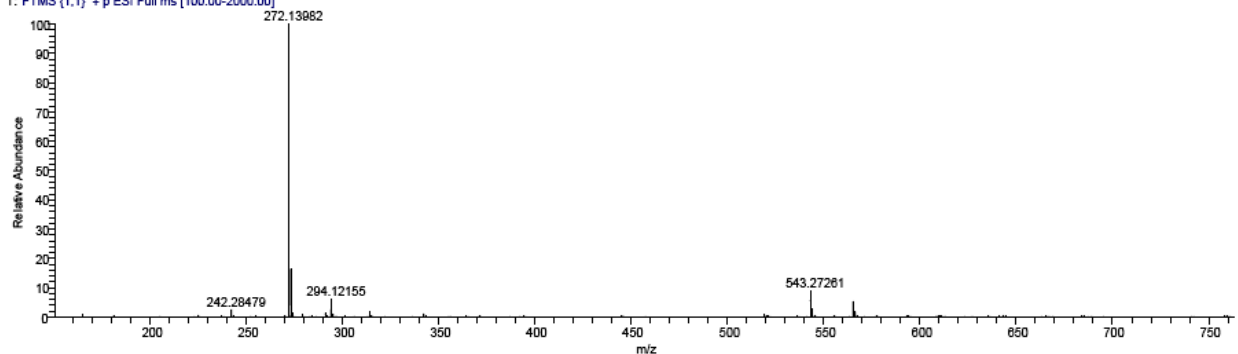

AKL-NH-BN#8-30 RT: 0.03-0.11 AV: 23

T: FTMS {1,1} + p ESI Full ms [100.00-2000.00]

| m/z       | Intensity   | Relative | Theo. Mass | Delta (ppm) | RDB equiv. | Composition                                                   |
|-----------|-------------|----------|------------|-------------|------------|---------------------------------------------------------------|
| 272.13975 | 172969136.0 | 100.00   | 272.13935  | 1.47        | 8.5        | C <sub>15</sub> H <sub>18</sub> O <sub>2</sub> N <sub>3</sub> |
| 273.14269 | 28560118.0  | 16.51    |            |             |            |                                                               |

## IR spectra of 4

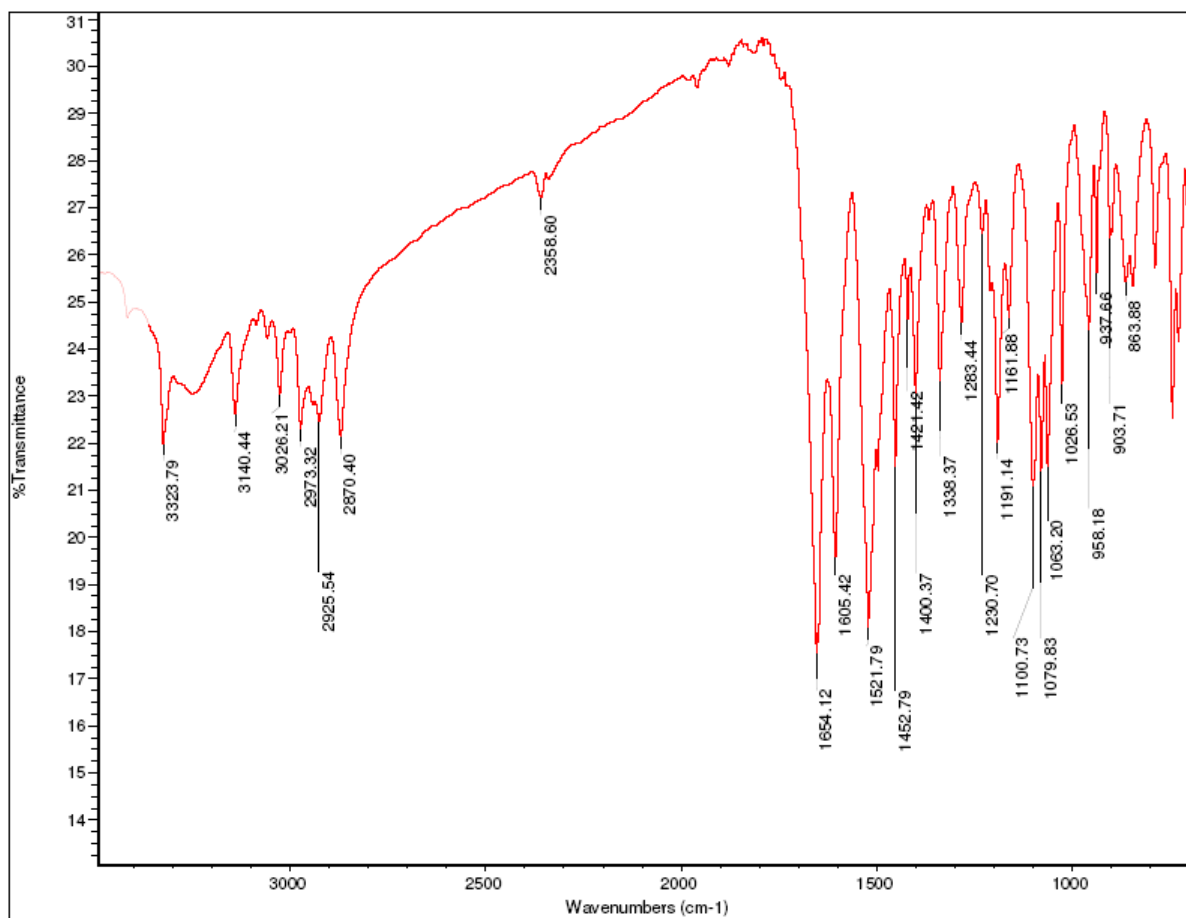

$^1\text{H}$  NMR spectra of **5**

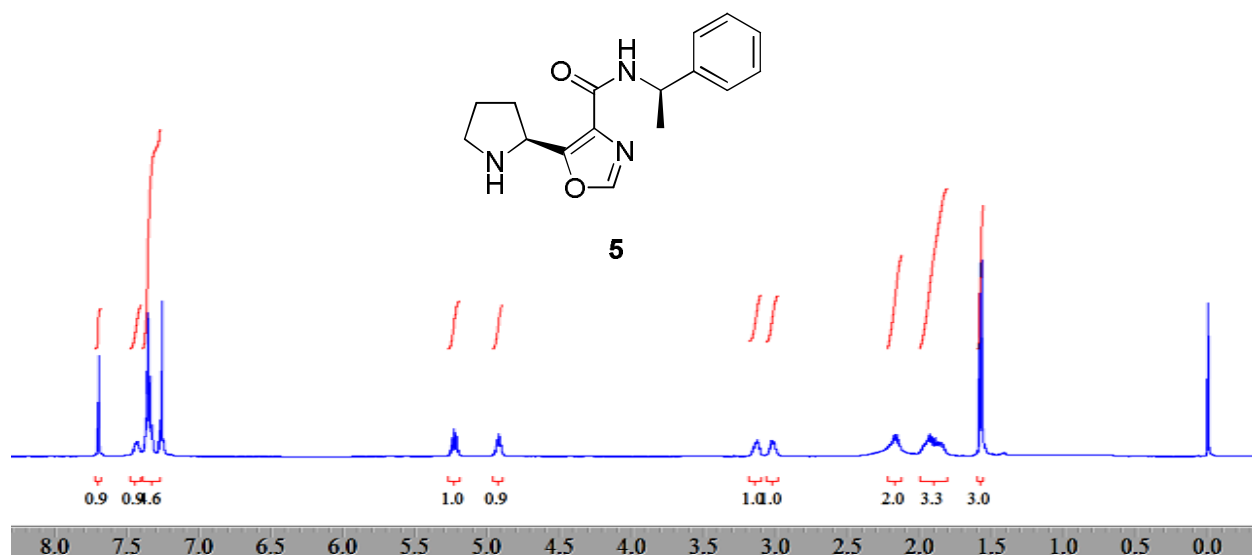

$^{13}\text{C}$  NMR spectra of **5**

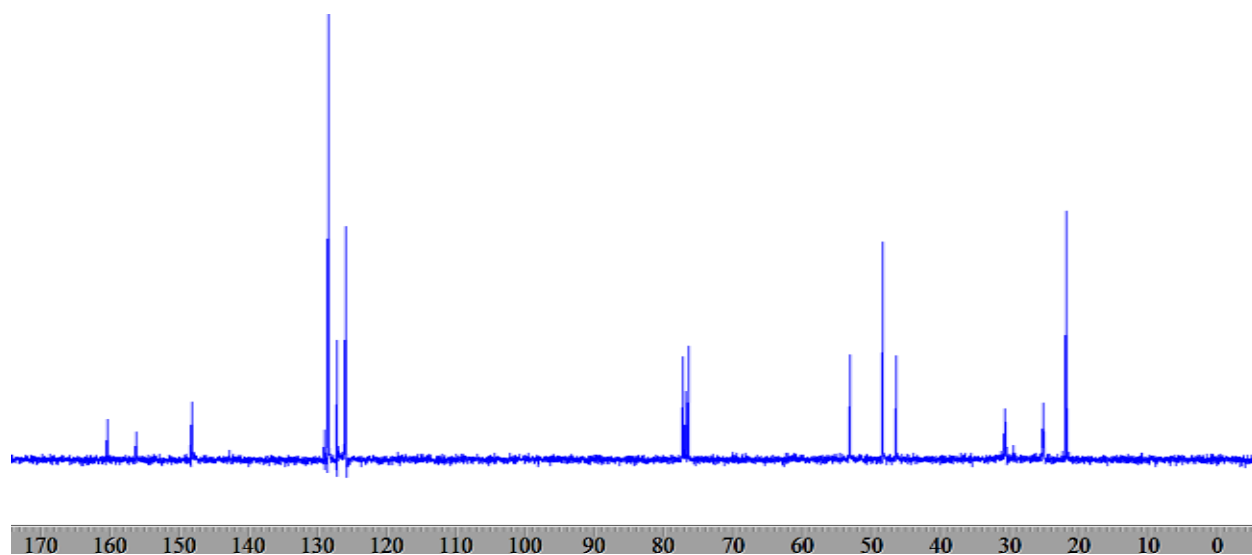

## HRMS spectra of 5

AKL-NH-R-ME#2-111 RT: 0.01-0.38 AV: 110 SB: 377 0.73-2.00 NL: 4.07E7  
 T: FTMS (1,1) + p ESI Full ms [100.00-2000.00]

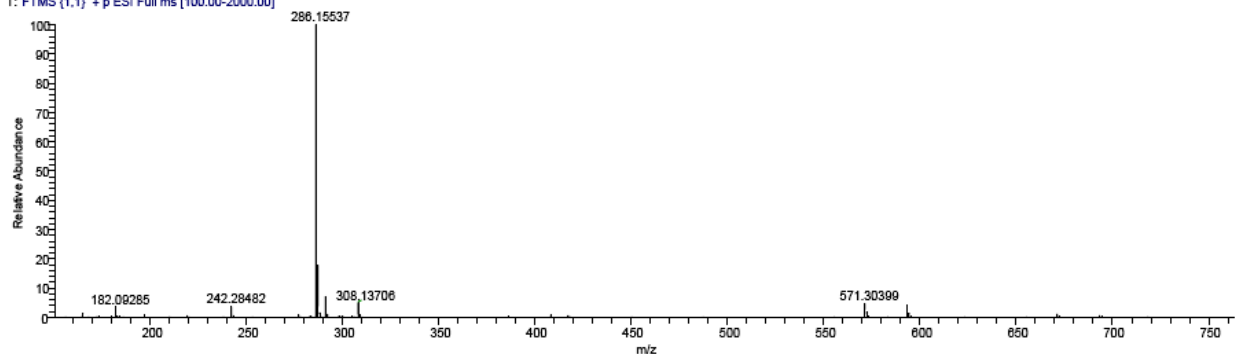

AKL-NH-R-ME#8-30 RT: 0.03-0.11 AV: 23

T: FTMS {1,1} + p ESI Full ms [100.00-2000.00]

| m/z       | Intensity   | Relative | Theo. Mass | Delta (ppm) | RDB equiv. | Composition                                                   |
|-----------|-------------|----------|------------|-------------|------------|---------------------------------------------------------------|
| 286.15532 | 117799672.0 | 100.00   | 286.15500  | 1.10        | 8.5        | C <sub>16</sub> H <sub>20</sub> O <sub>2</sub> N <sub>3</sub> |
| 287.15826 | 20997312.0  | 17.82    |            |             |            |                                                               |

## IR spectra of 5

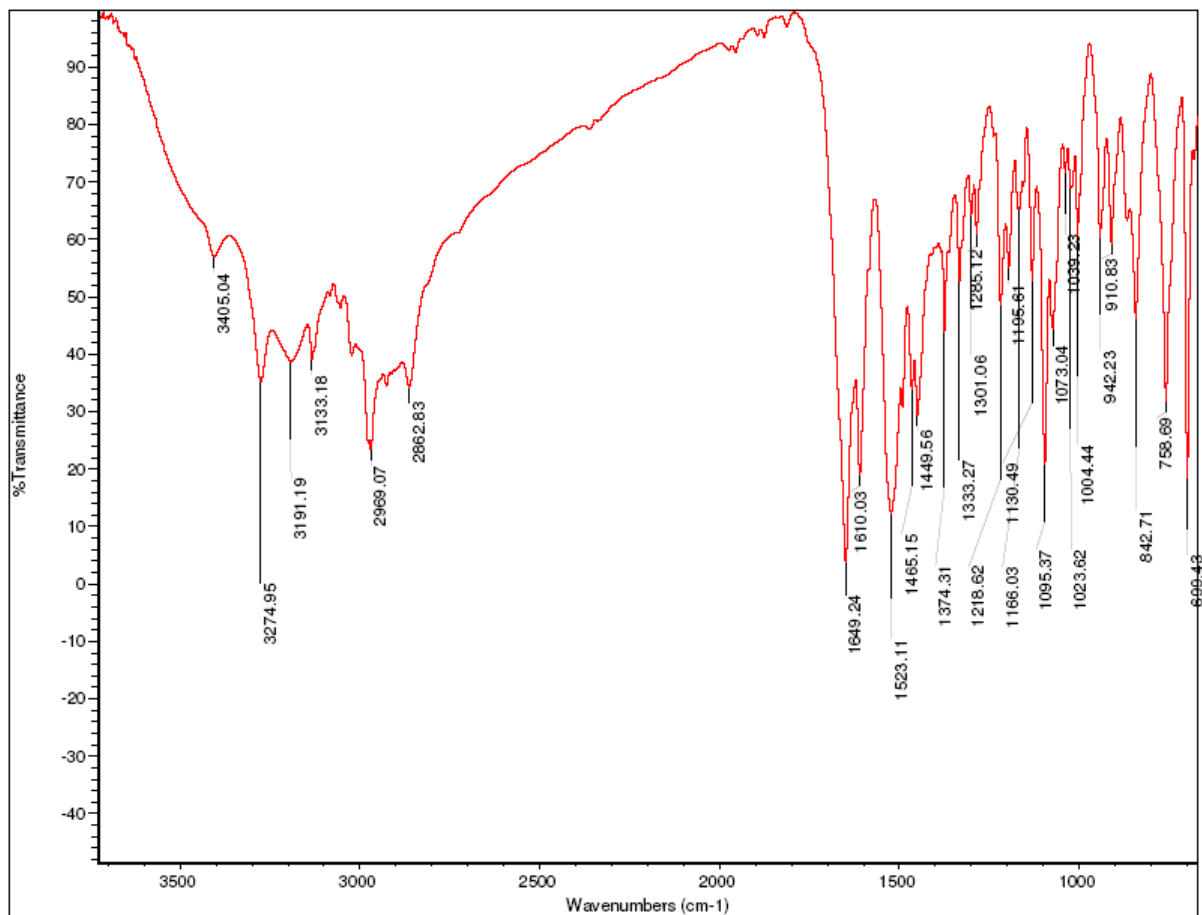



$^1\text{H}$  NMR spectra of **6**

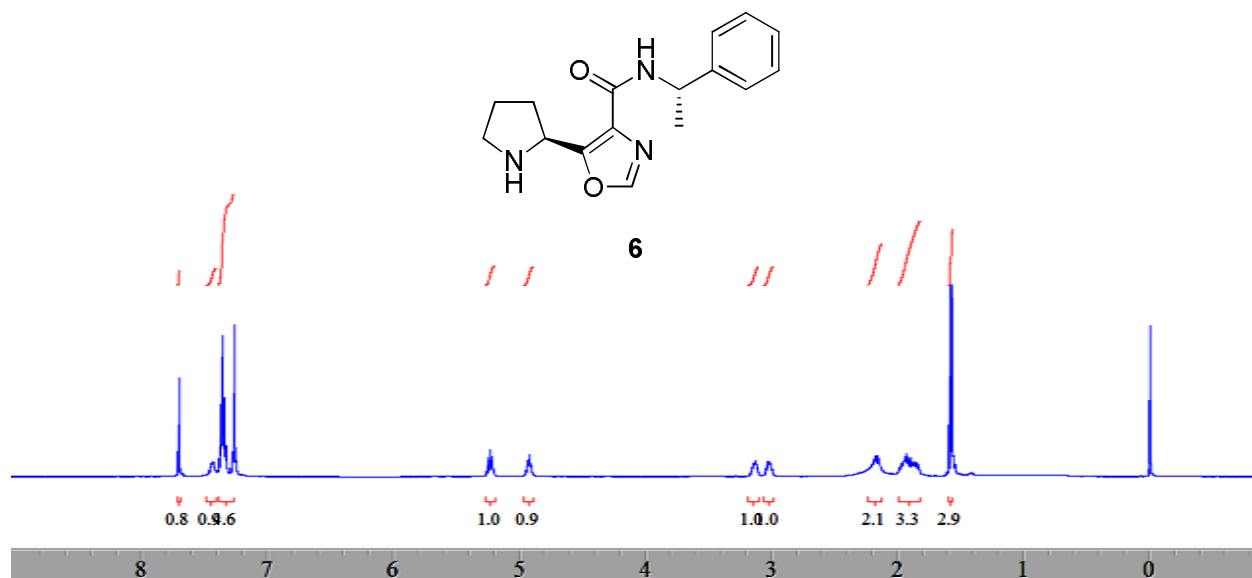

$^{13}\text{C}$  NMR spectra of **6**

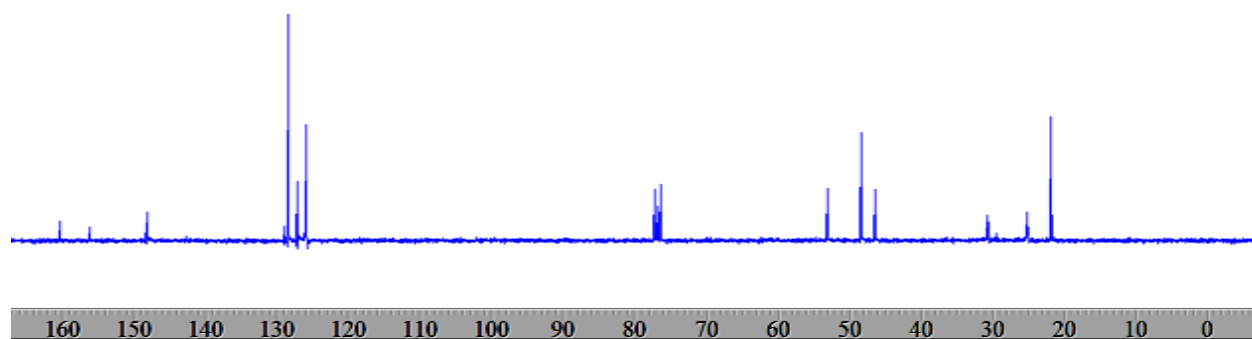

## HRMS spectra of 6

AKL-NH-SME #3-112 RT: 0.01-0.38 AV: 110 SB: 376 0.73-2.00 NL: 4.31E7  
 T: FTMS (1,1) + p ESI Full ms [100.00-2000.00]

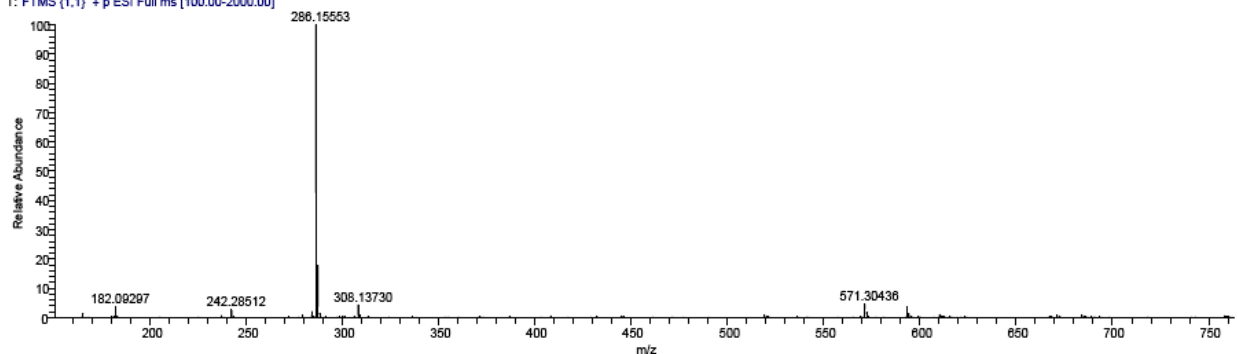

AKL-NH-SME#8-30 RT: 0.03-0.11 AV: 23

T: FTMS {1,1} + p ESI Full ms [100.00-2000.00]

| m/z       | Intensity   | Relative | Theo. Mass | Delta (ppm) | RDB equiv. | Composition                                                   |
|-----------|-------------|----------|------------|-------------|------------|---------------------------------------------------------------|
| 286.15551 | 123481584.0 | 100.00   | 286.15500  | 1.77        | 8.5        | C <sub>16</sub> H <sub>20</sub> O <sub>2</sub> N <sub>3</sub> |
| 287.15843 | 22120124.0  | 17.91    |            |             |            |                                                               |

## IR spectra of 6

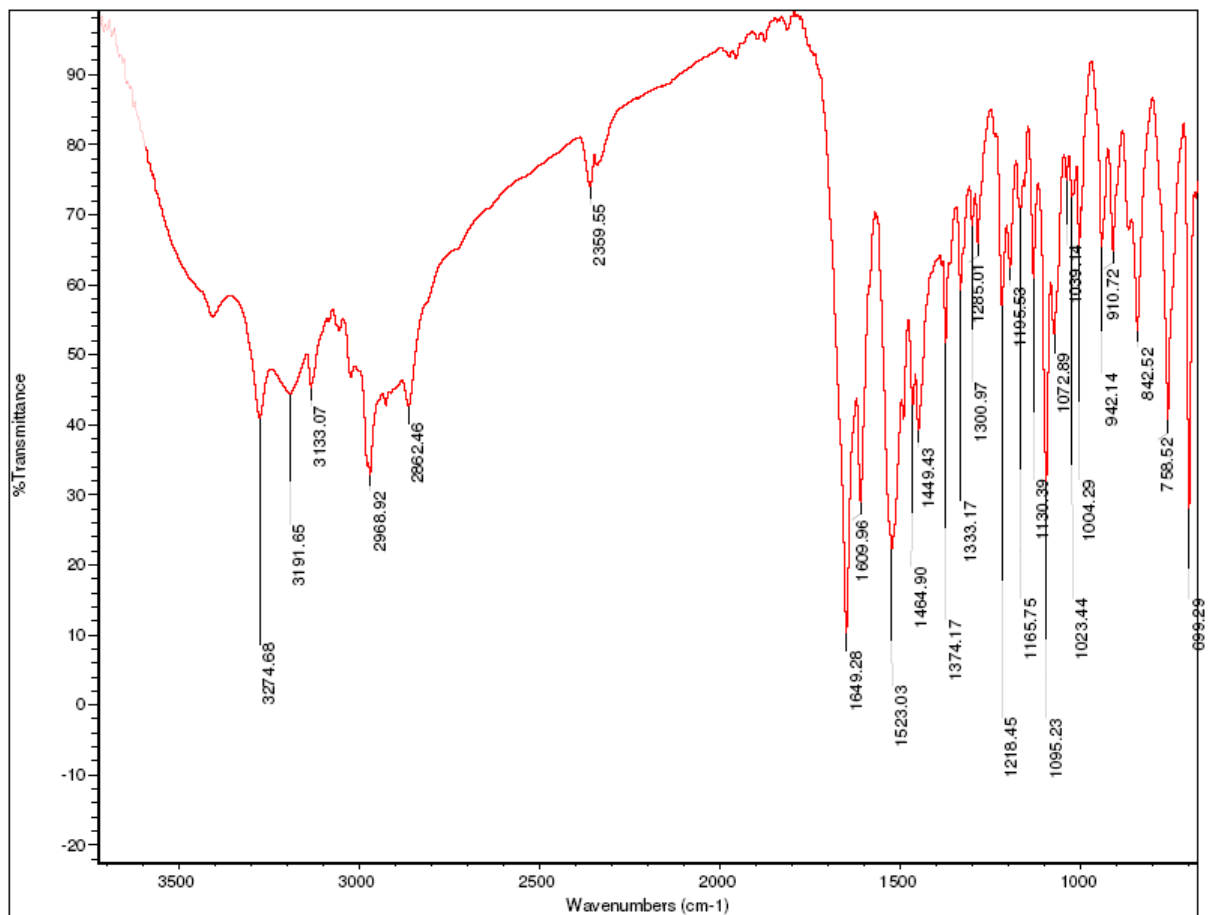

<sup>1</sup>H NMR spectra of **13a**

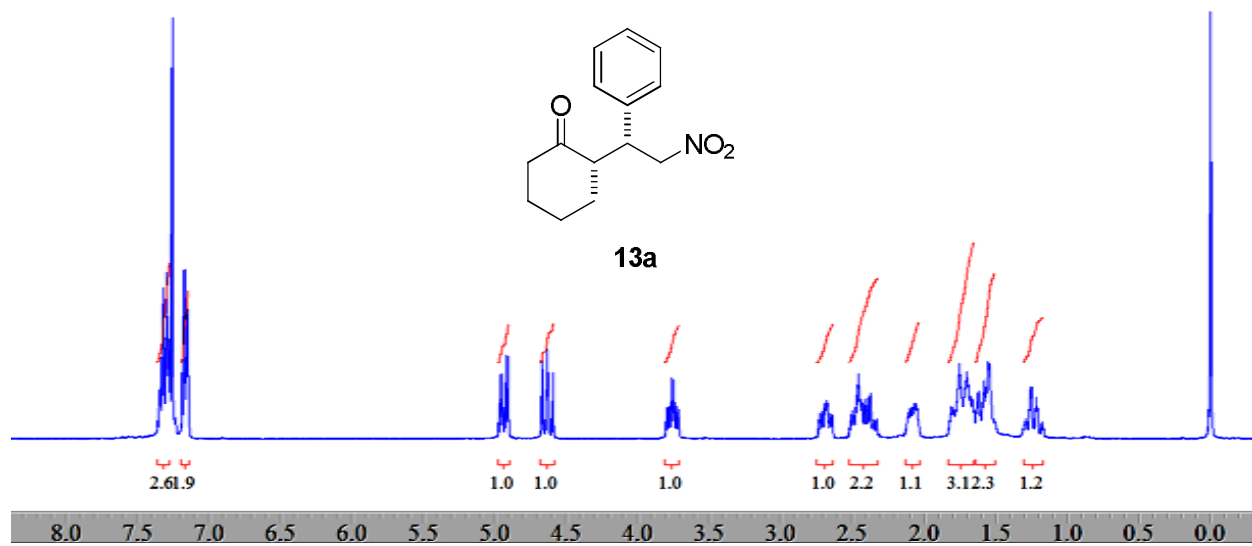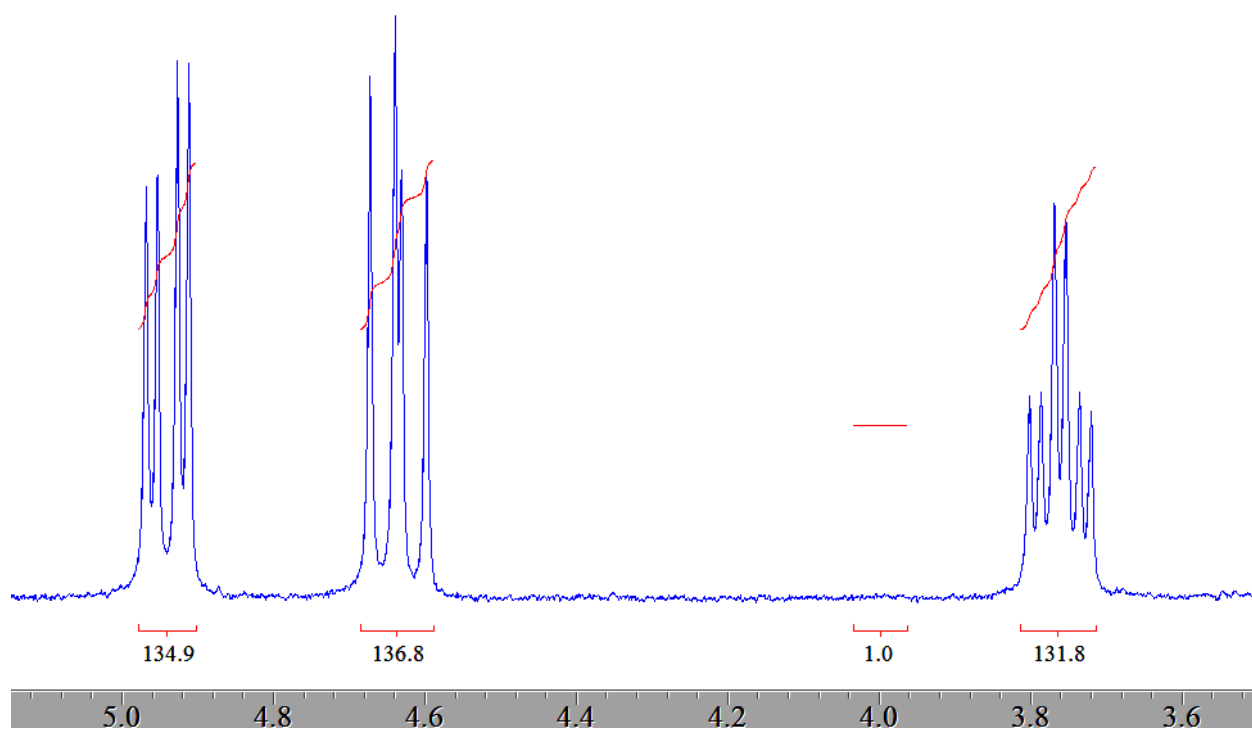

$^{13}\text{C}$  NMR spectra of **13a**

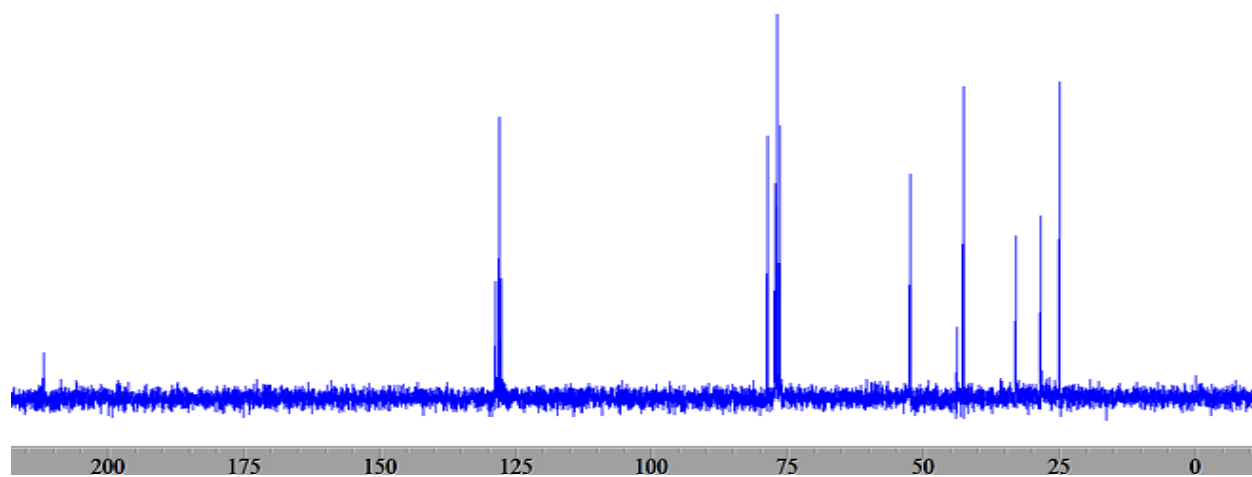

$^1\text{H}$  NMR spectra of **13b**

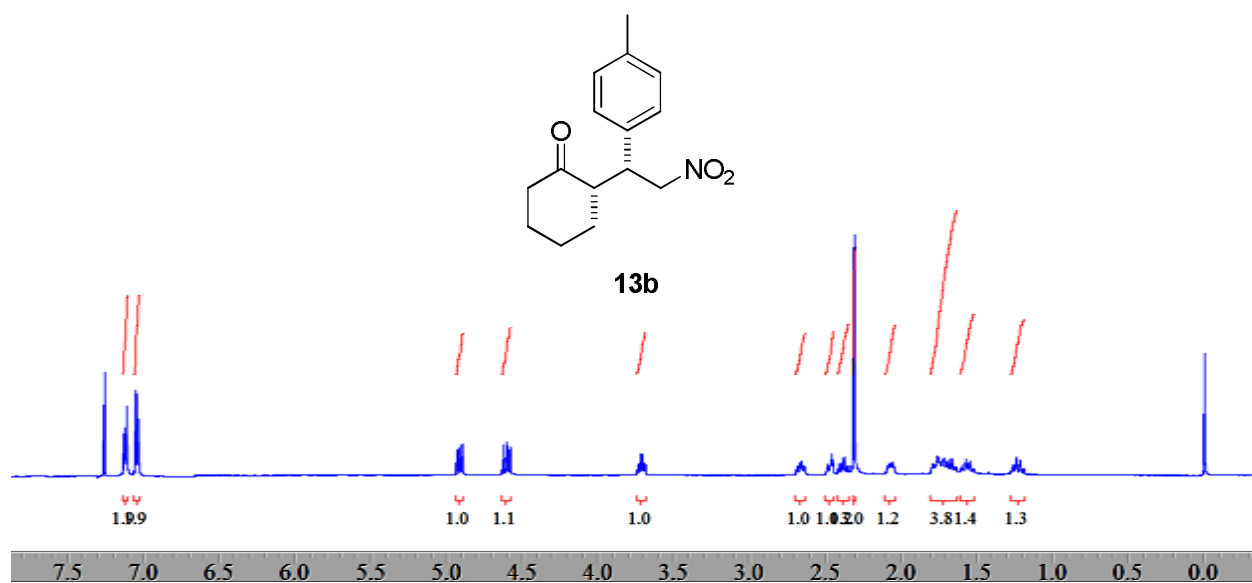

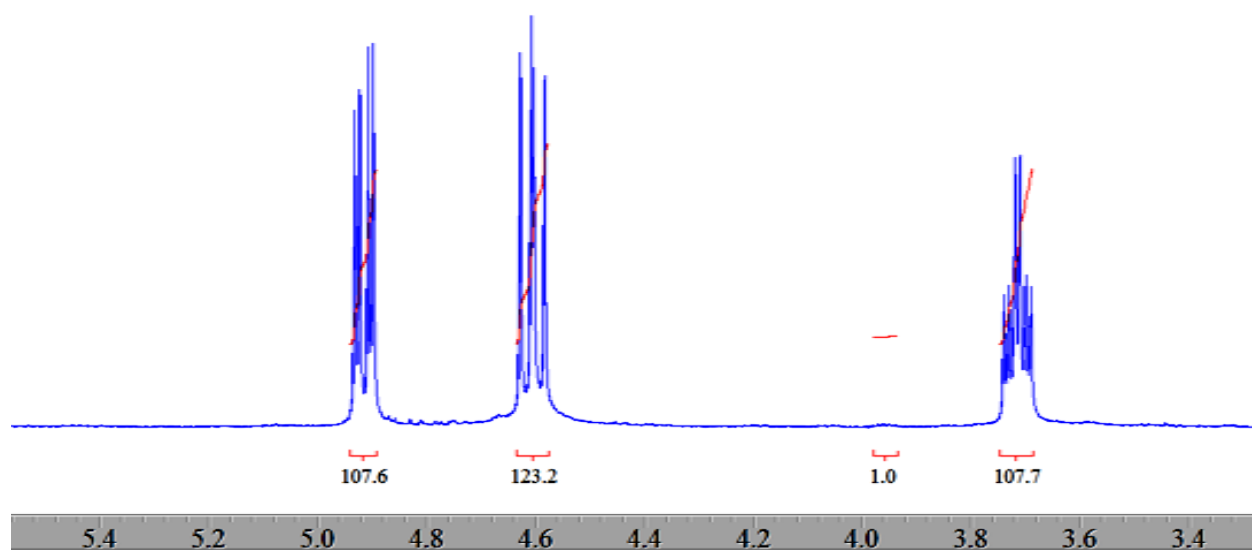

$^{13}\text{C}$  NMR spectra of **13b**

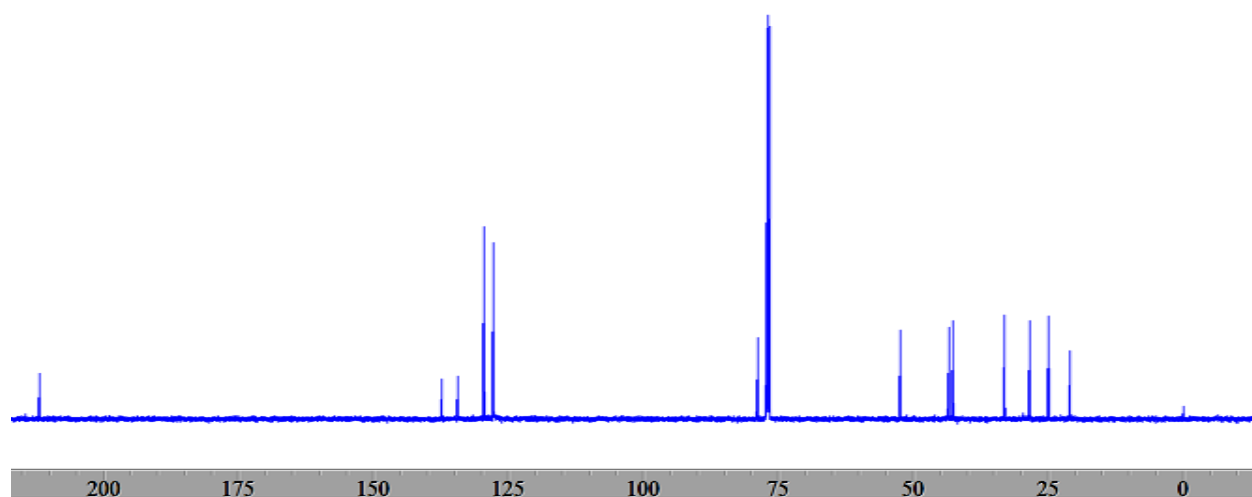

<sup>1</sup>H NMR spectra of **13c**

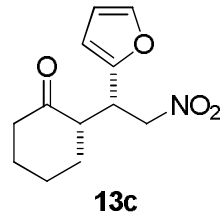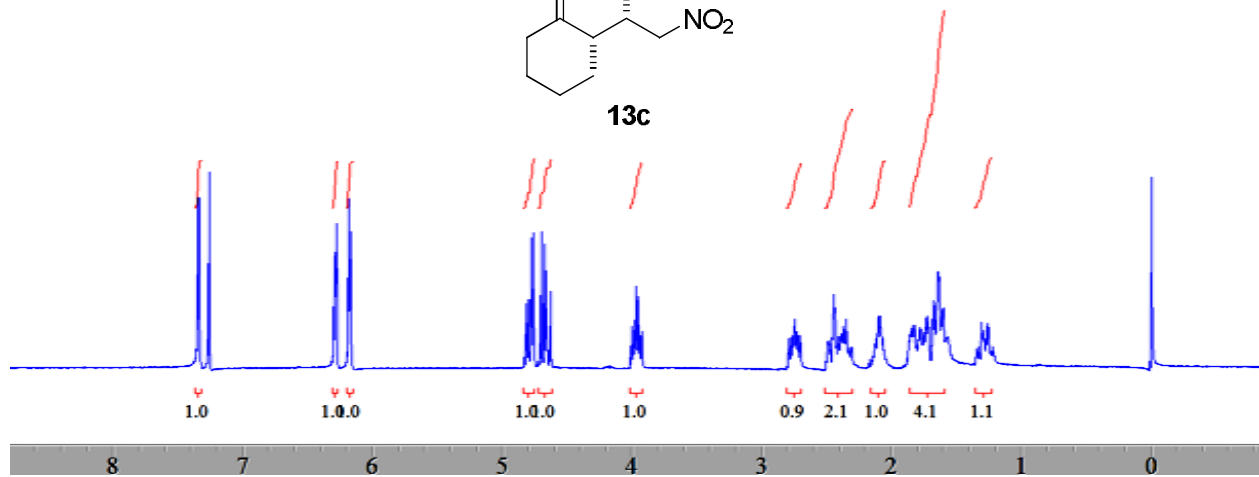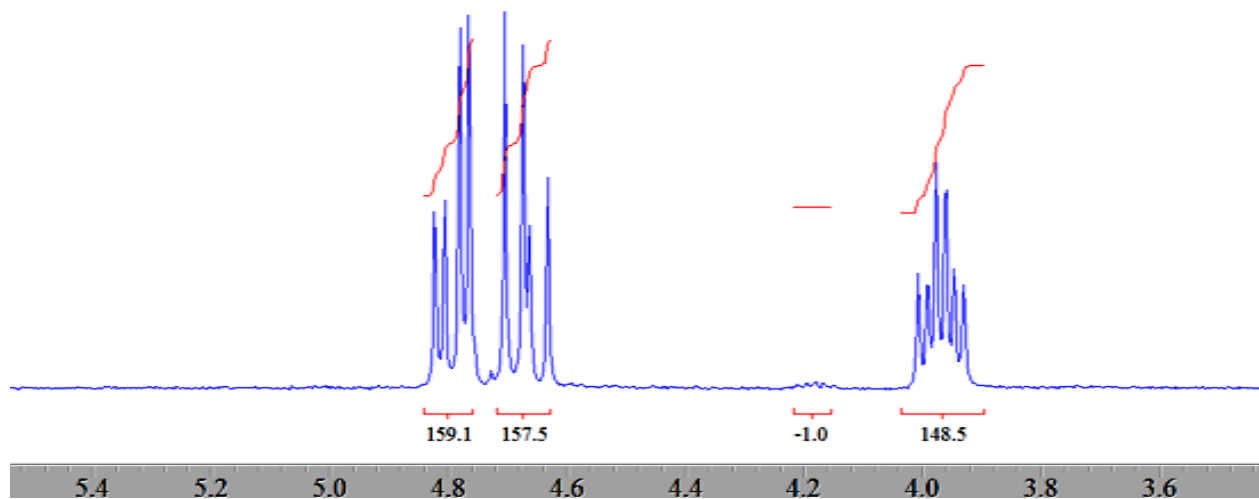

$^{13}\text{C}$  NMR spectra of **13c**

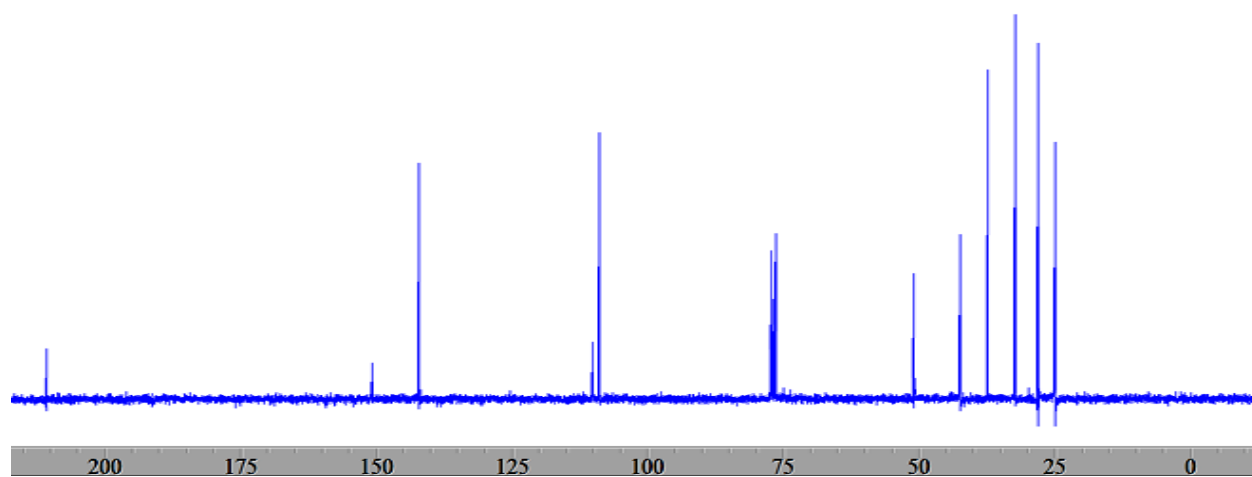

$^1\text{H}$  NMR spectra of **13d**

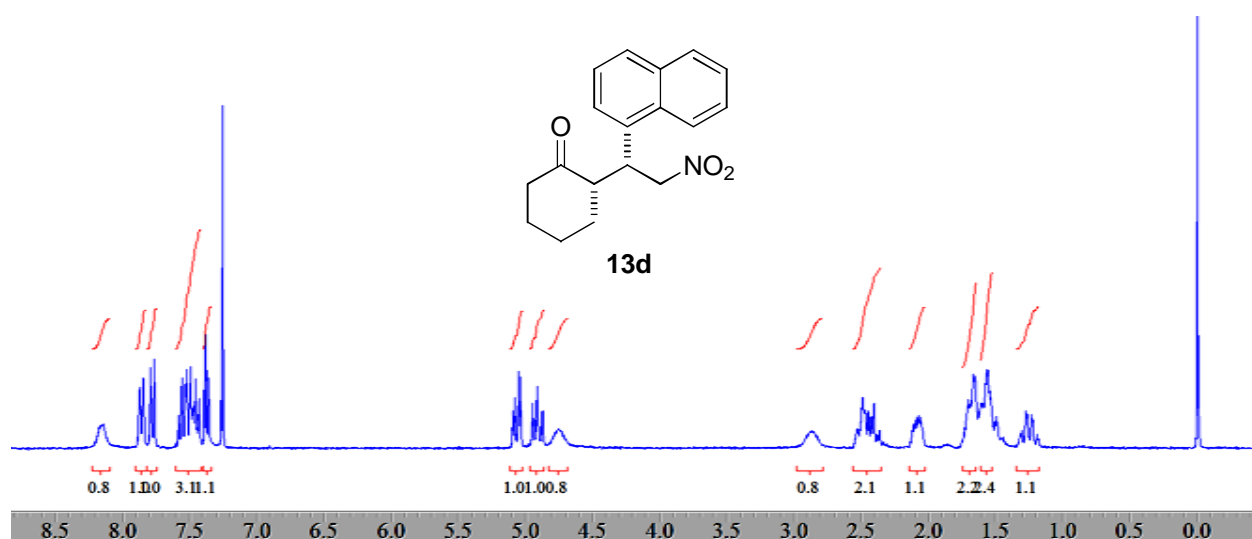

$^{13}\text{C}$  NMR spectra of **13d**

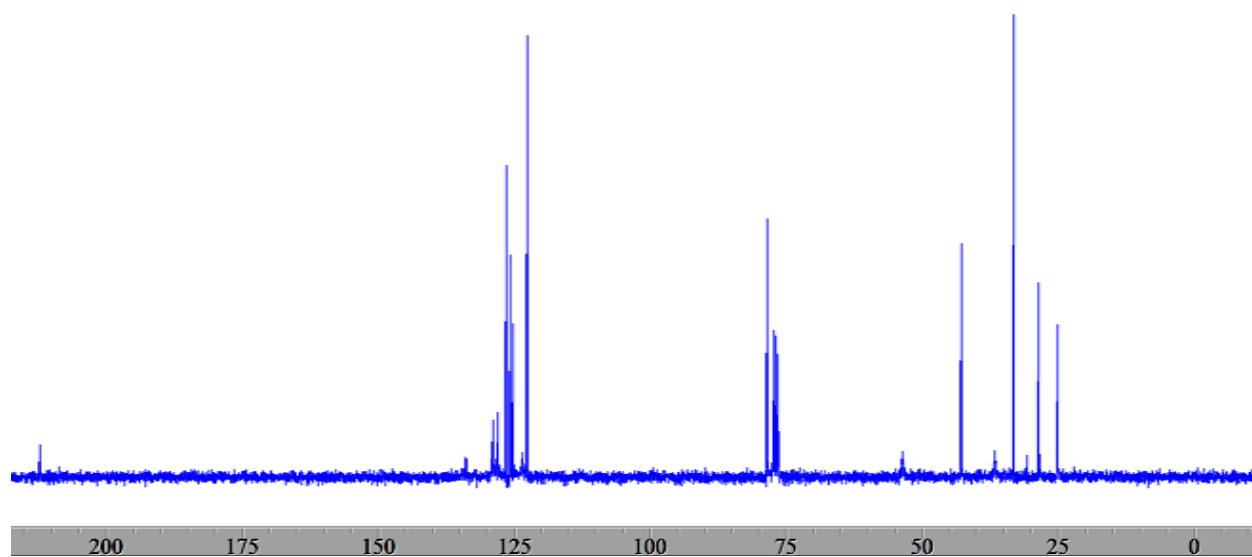

$^1\text{H}$  NMR spectra of **13e**

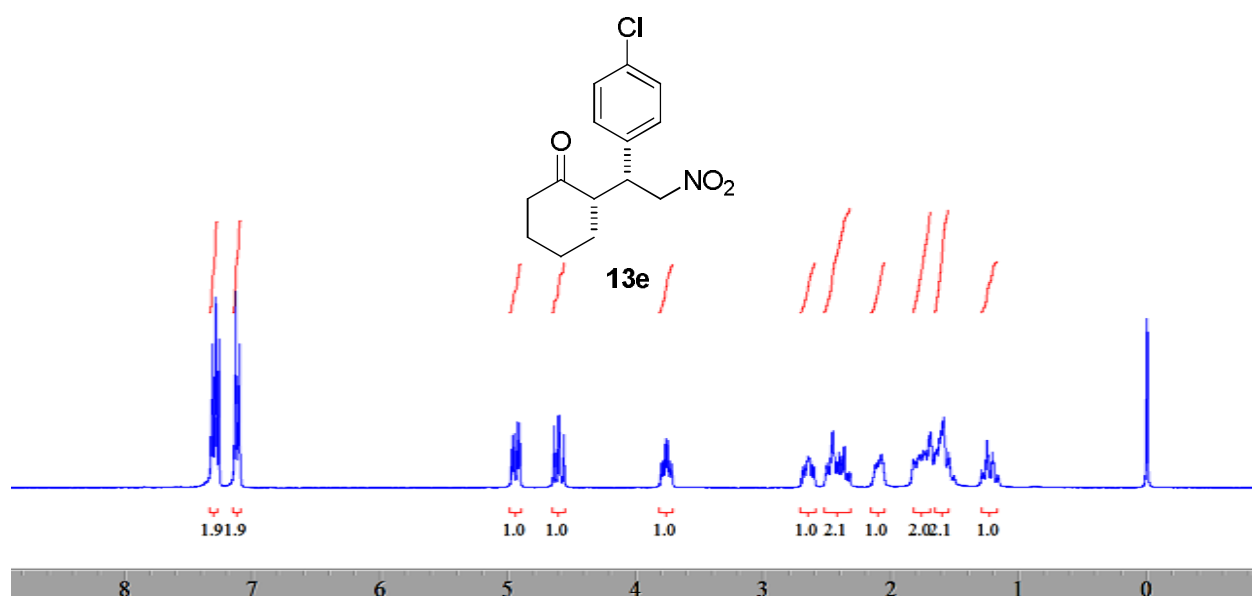



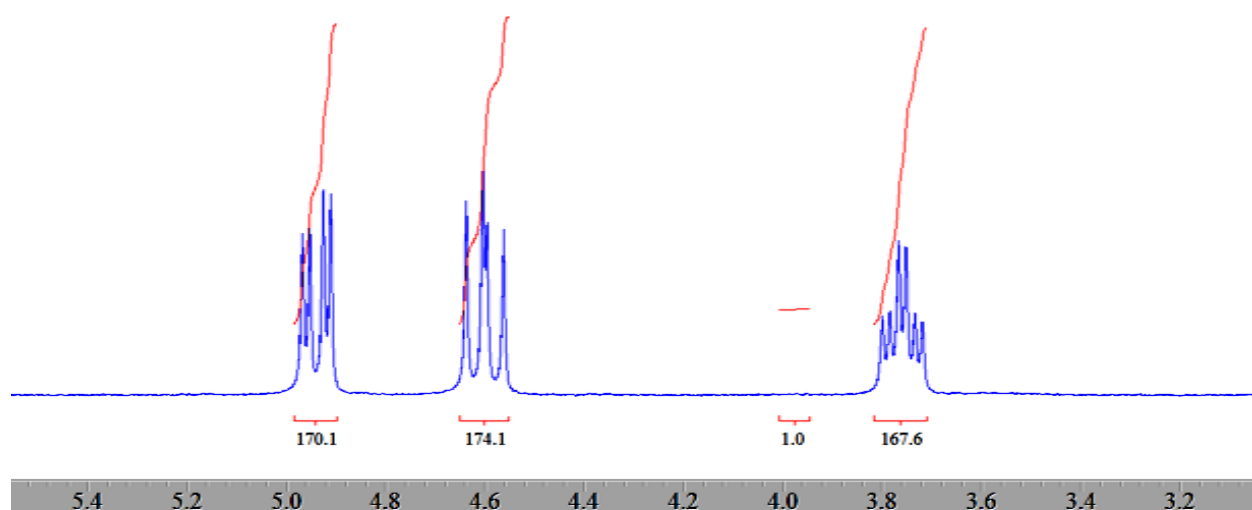

$^{13}\text{C}$  NMR spectra of **13e**

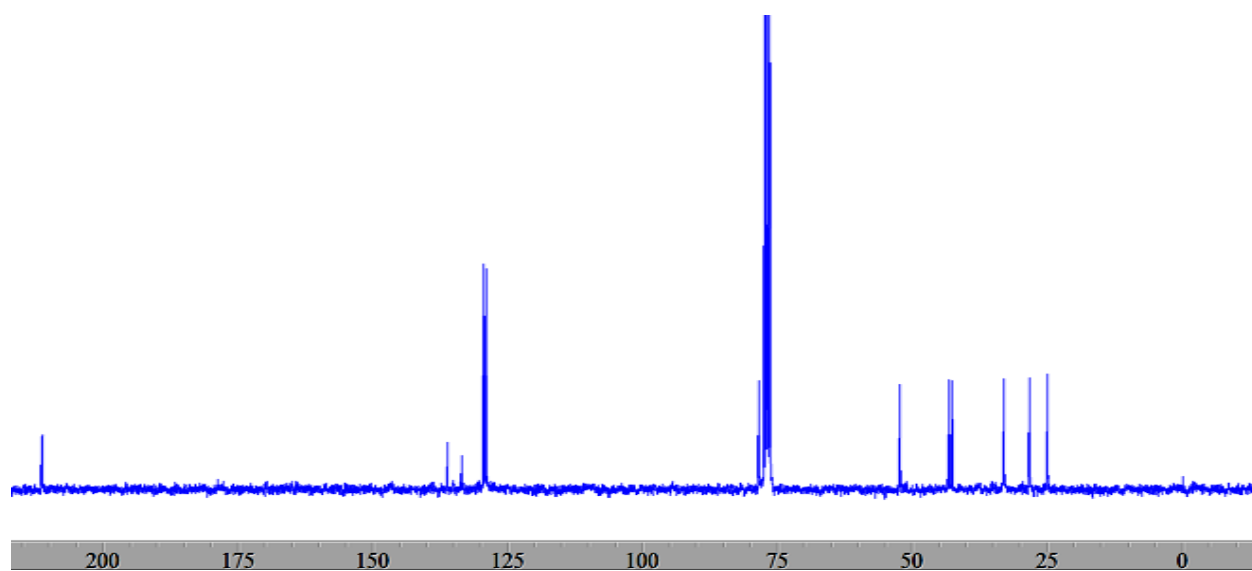

<sup>1</sup>H NMR spectra of **13f**

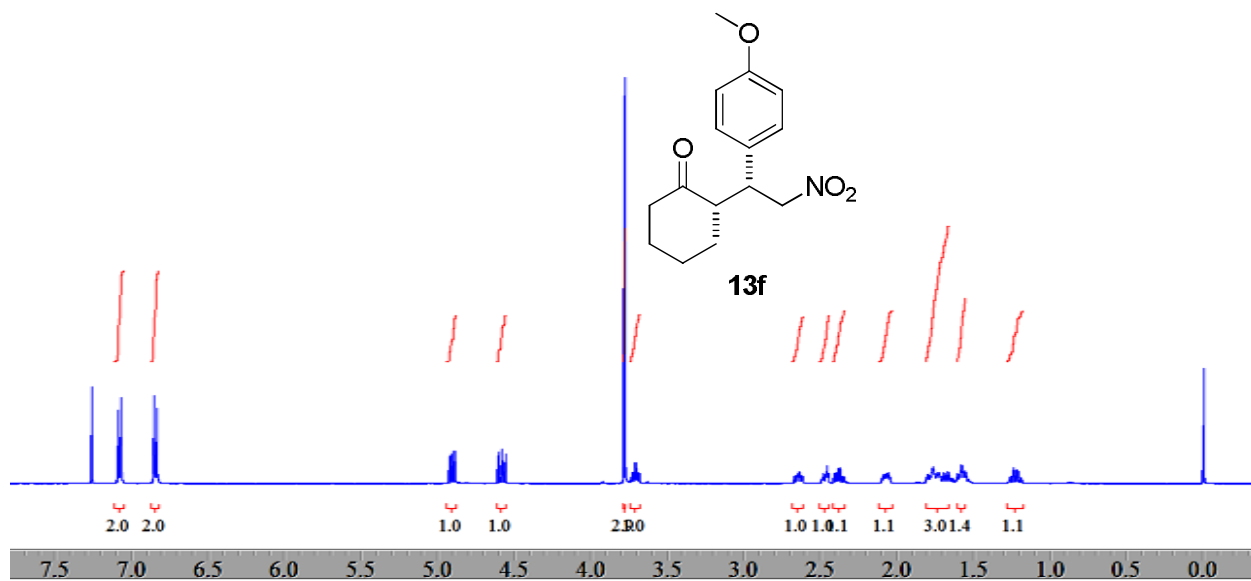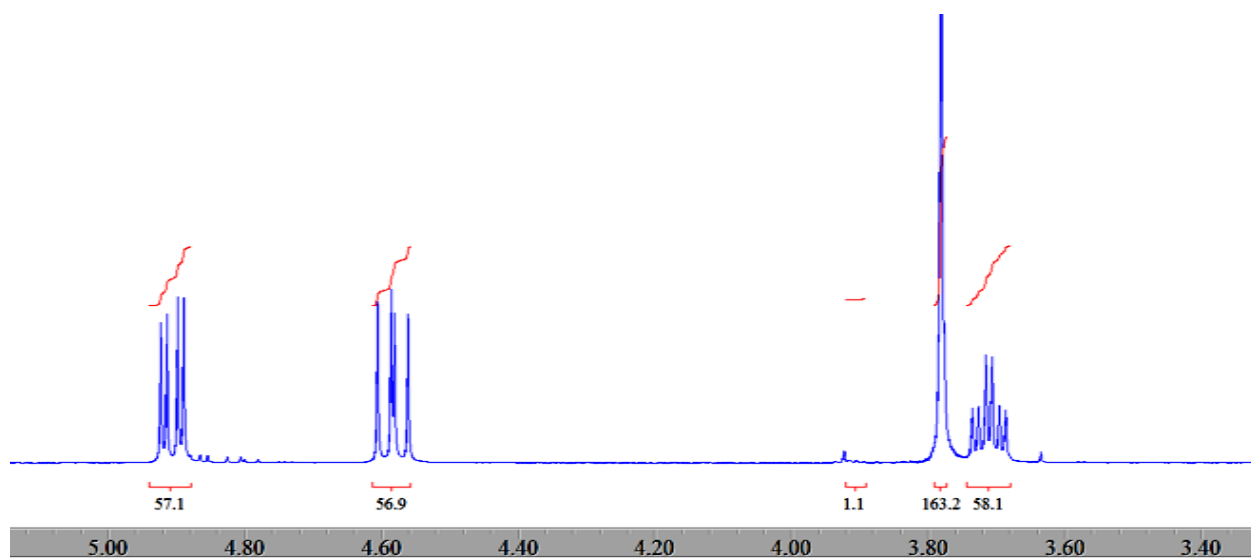

$^{13}\text{C}$  NMR spectra of **13f**

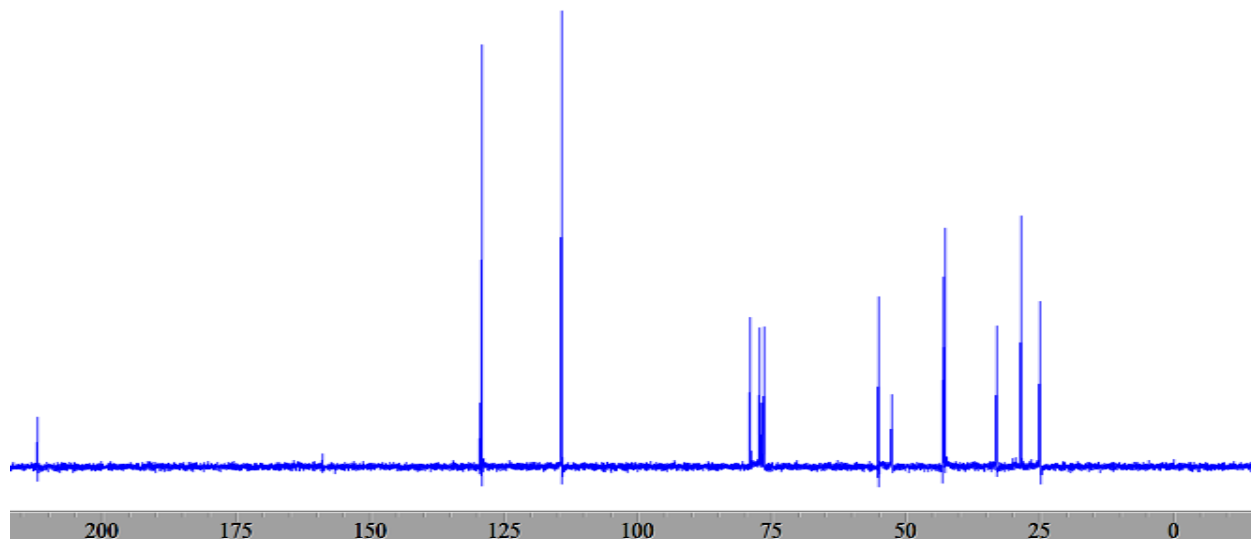

$^1\text{H}$  NMR spectra of **13g**

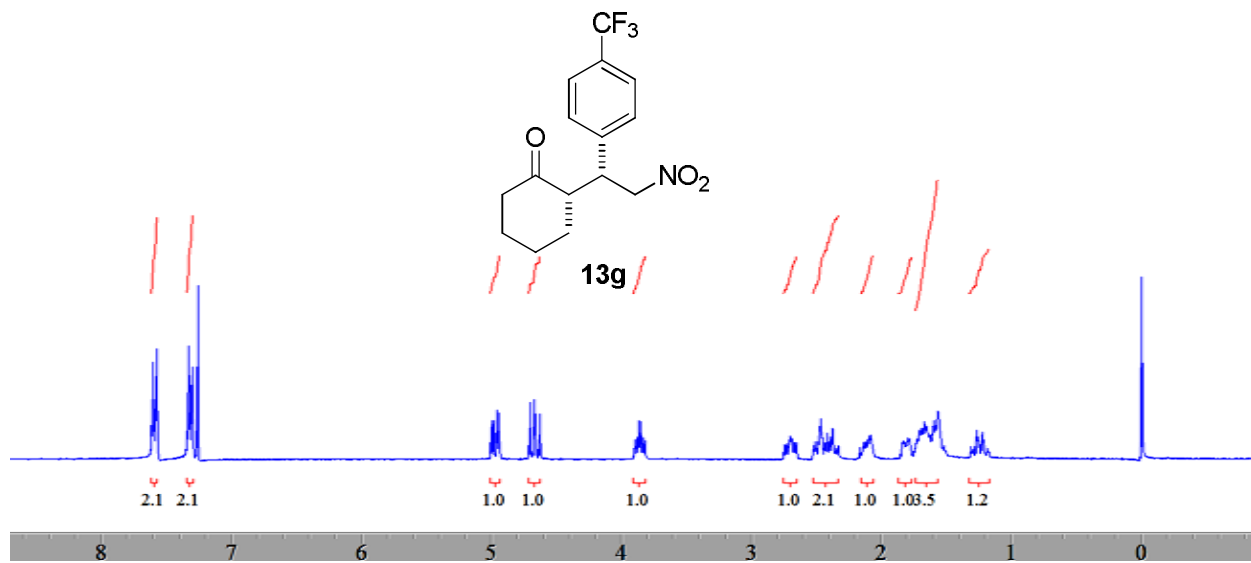

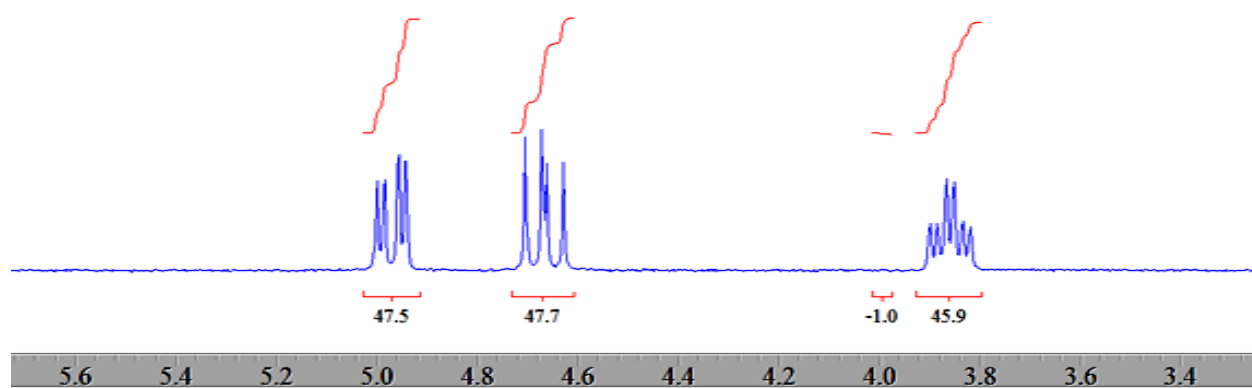

$^{13}\text{C}$  NMR spectra of **13g**

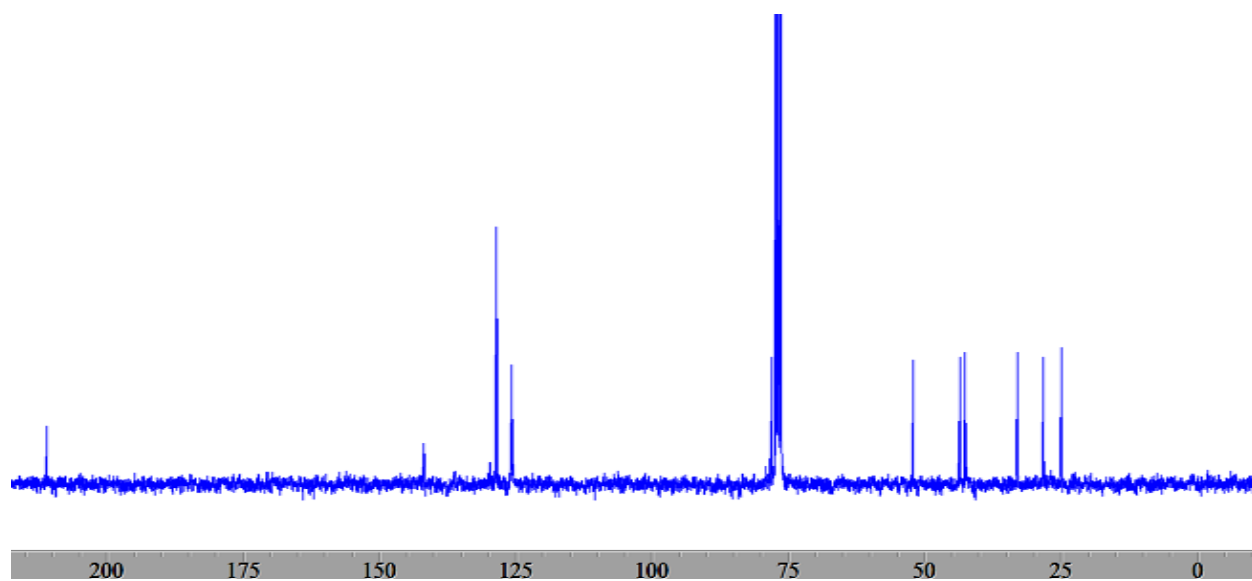

<sup>1</sup>H NMR spectra of **13h**

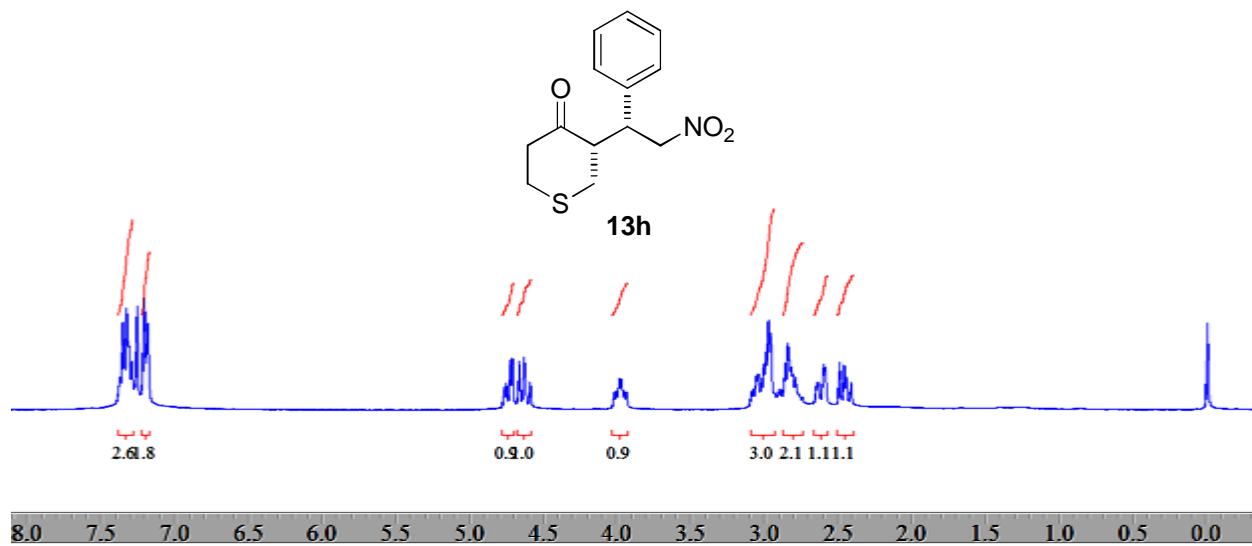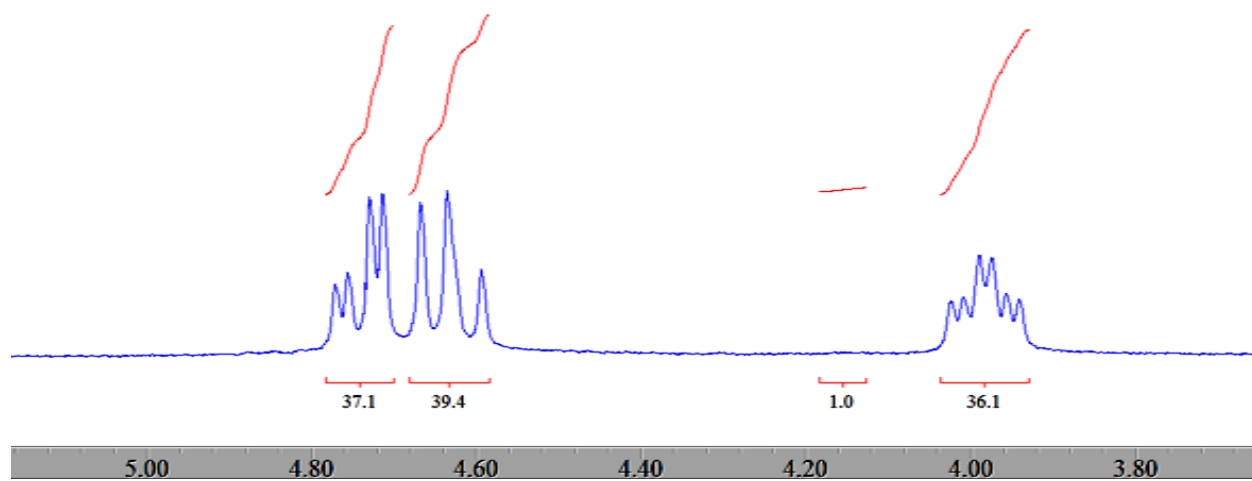

$^{13}\text{C}$  NMR spectra of **13h**

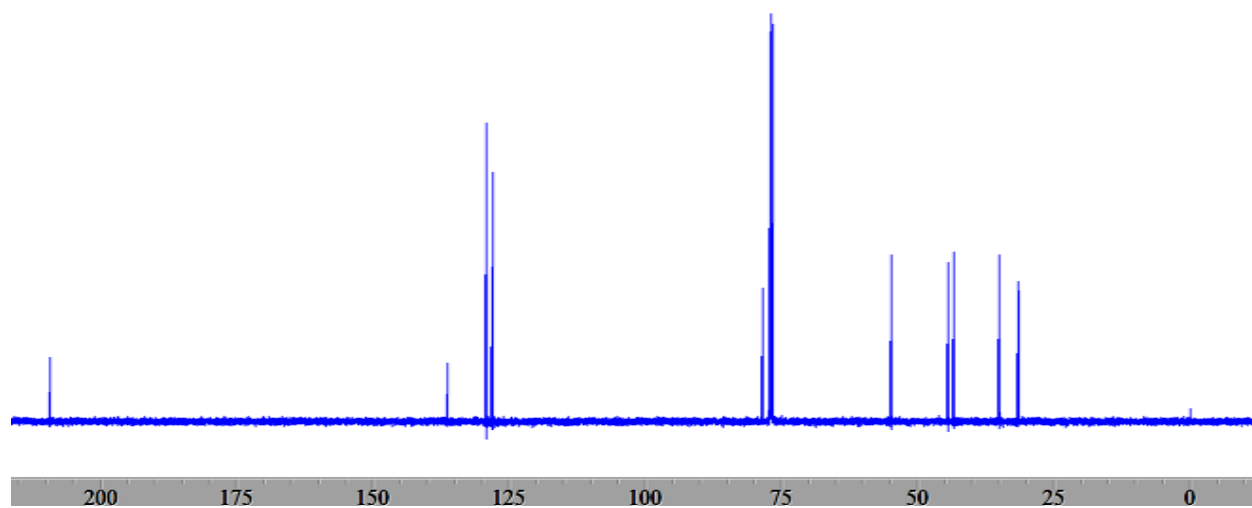

$^1\text{H}$  NMR spectra of **13i**

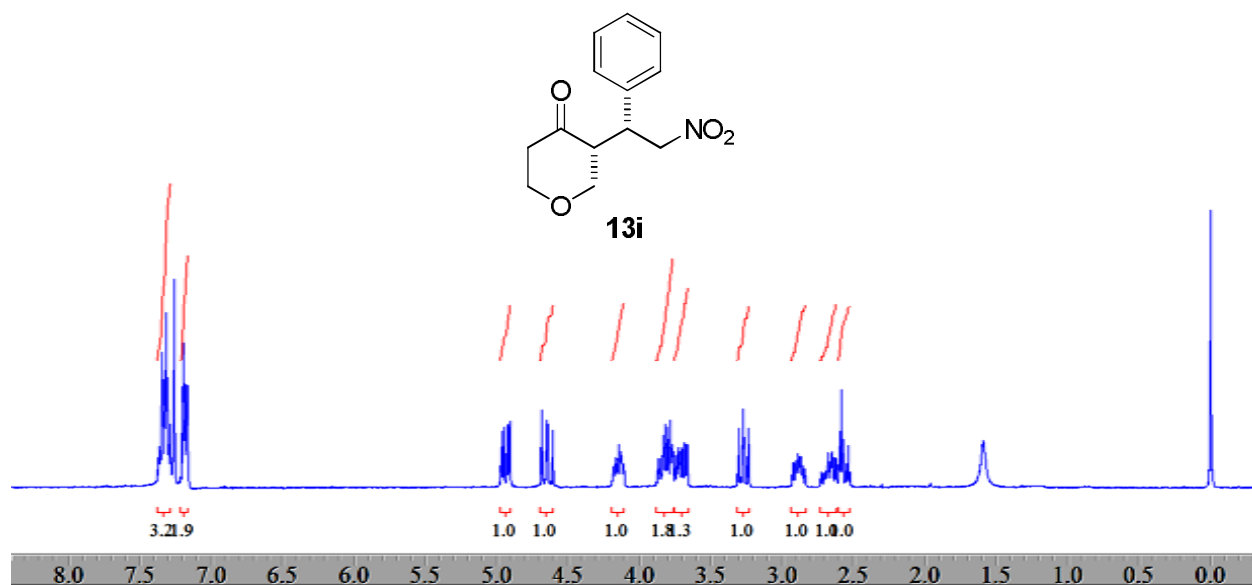

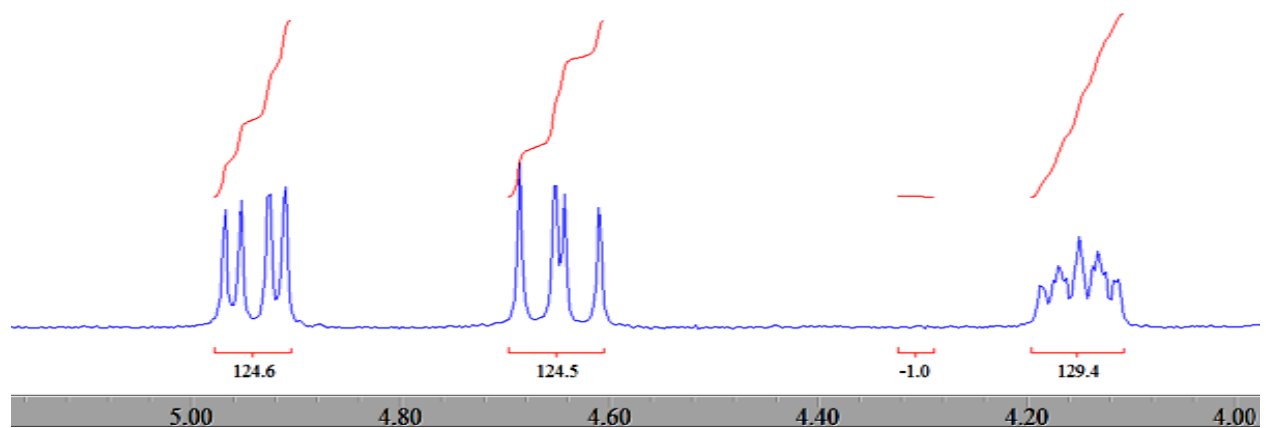

$^{13}\text{C}$  NMR spectra of **13i**

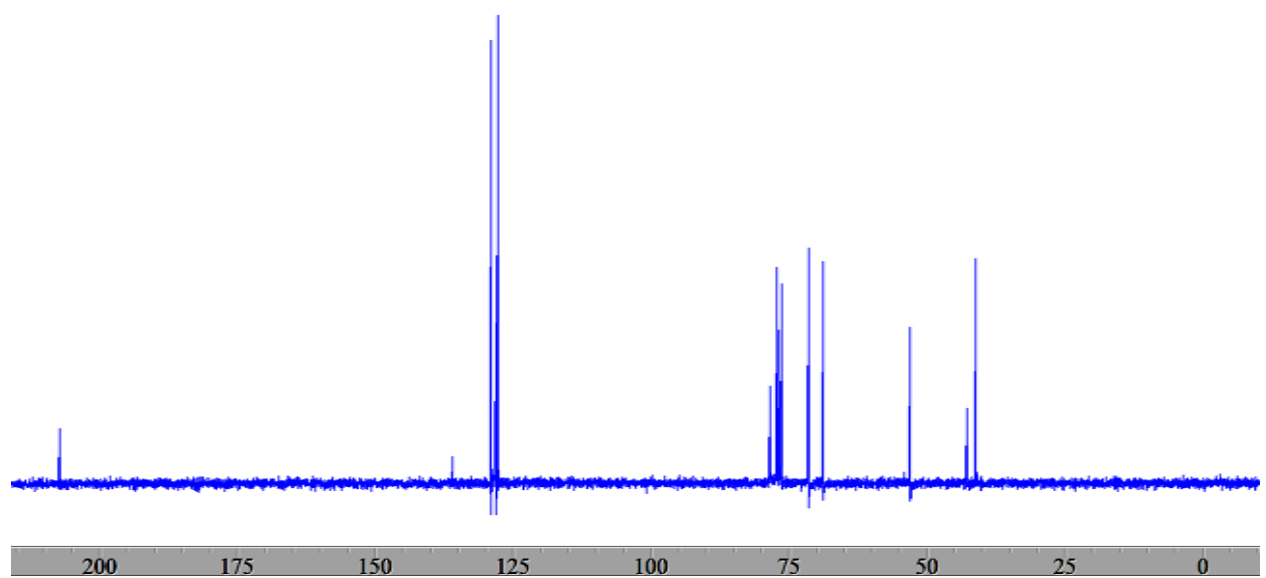

<sup>1</sup>H NMR spectra of **13j**

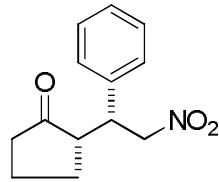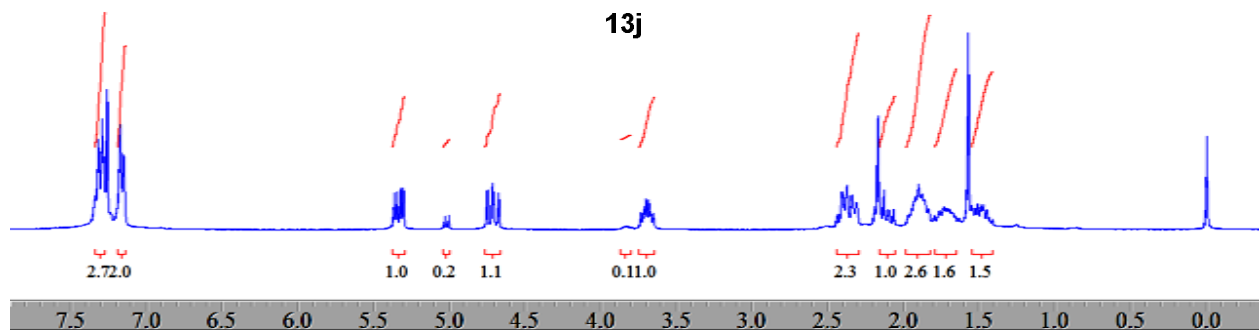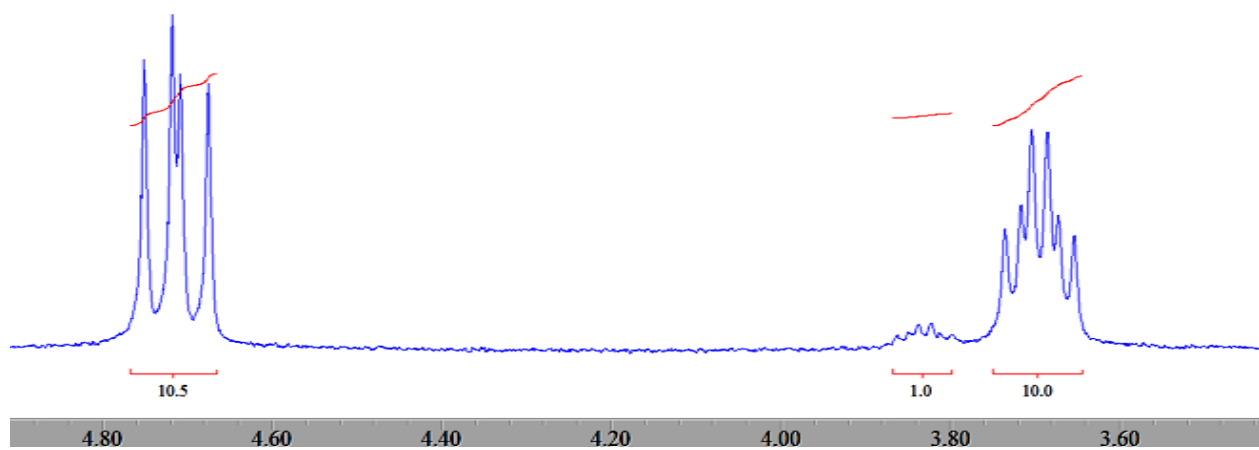



$^1\text{H}$  NMR spectra of **13j**

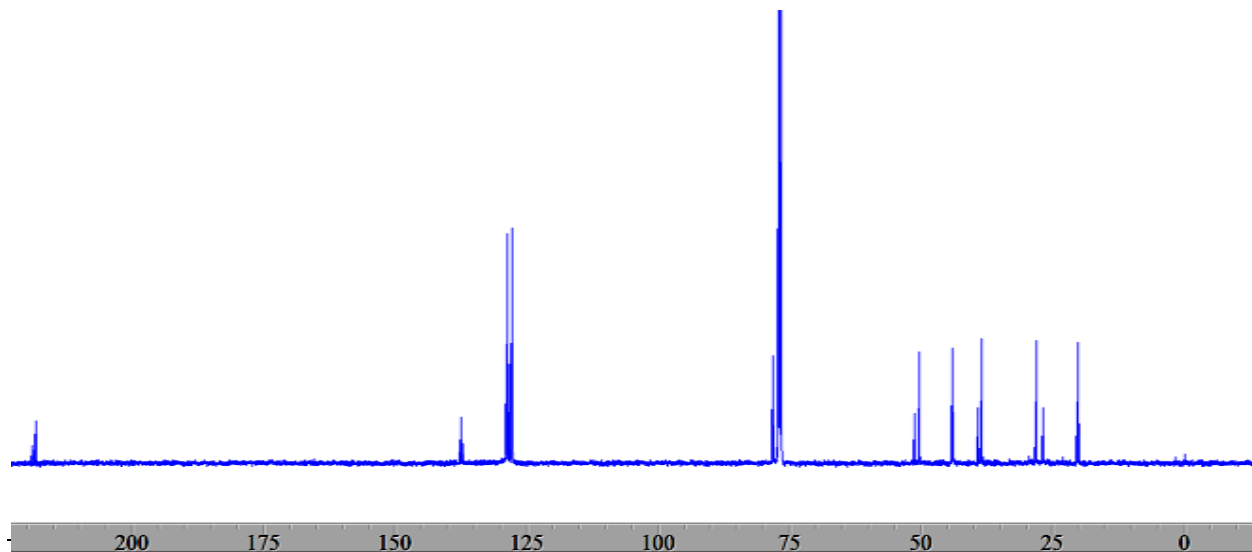

$^1\text{H}$  NMR spectra of **15a**

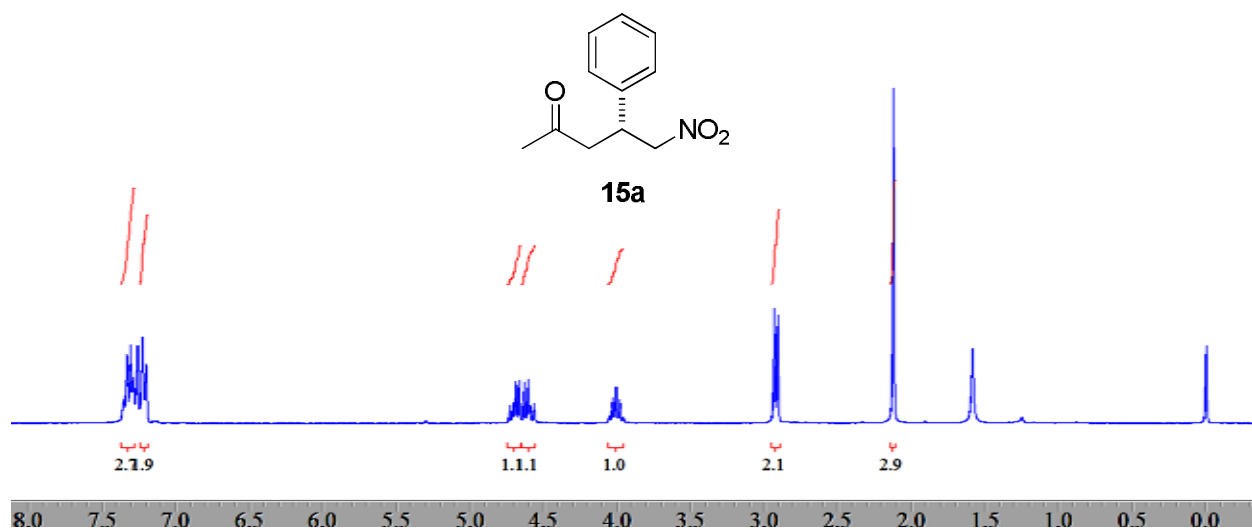

$^{13}\text{C}$  NMR spectra of **15a**

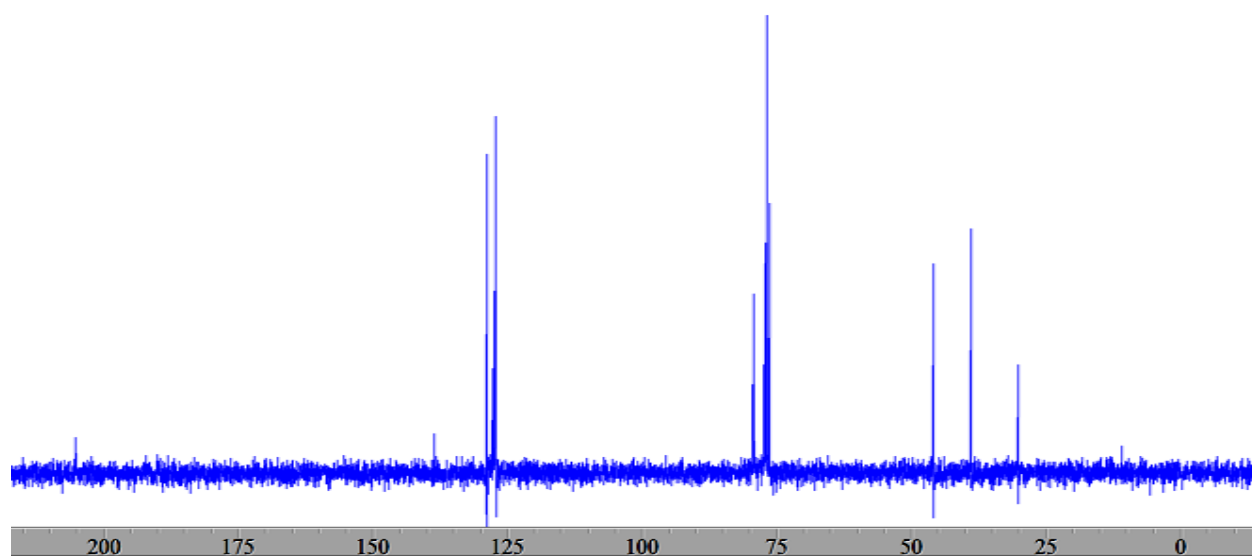

$^1\text{H}$  NMR spectra of **15b**

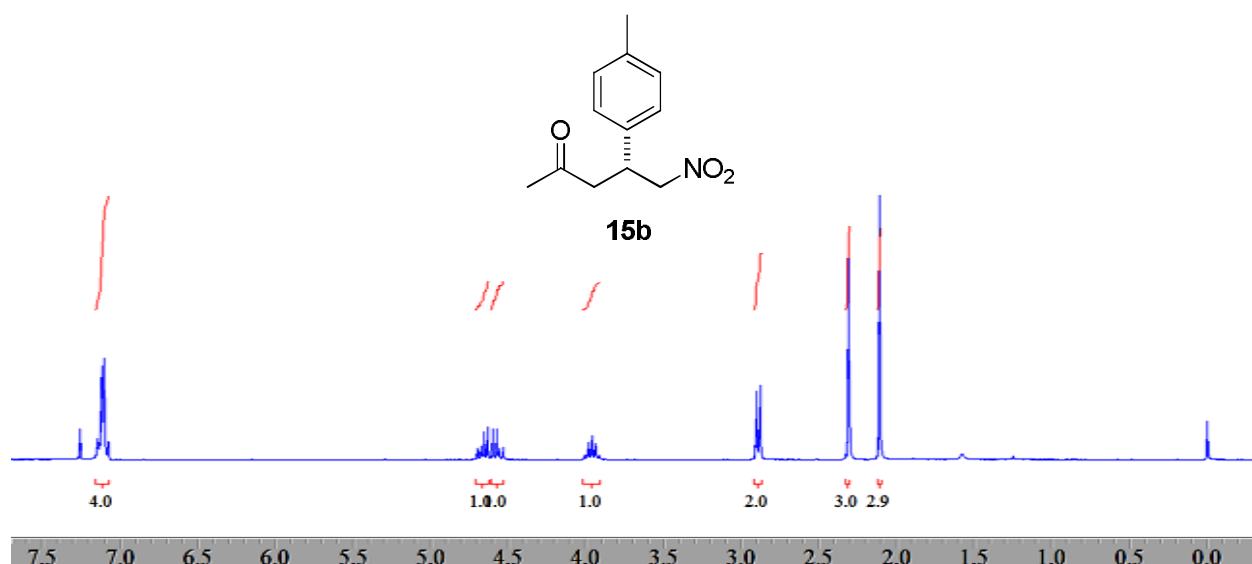

$^{13}\text{C}$  NMR spectra of **15b**

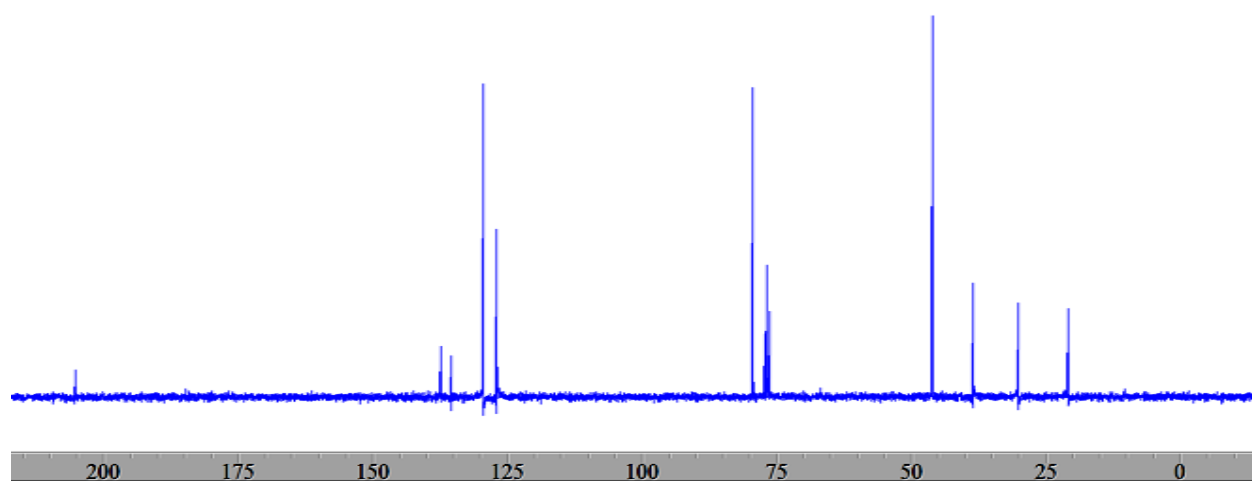

$^1\text{H}$  NMR spectra of **15c**

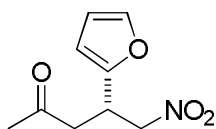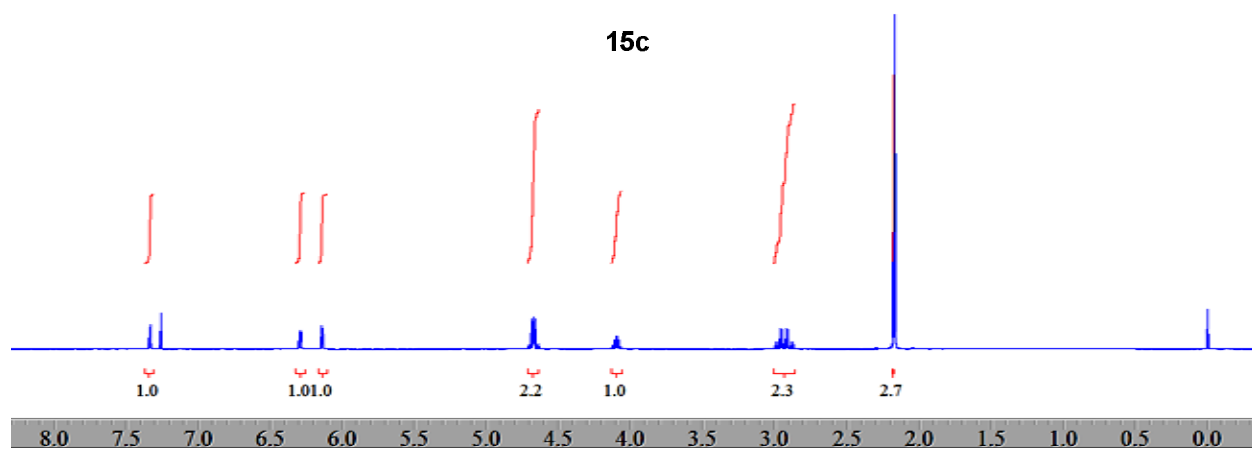

$^{13}\text{C}$  NMR spectra of **15c**

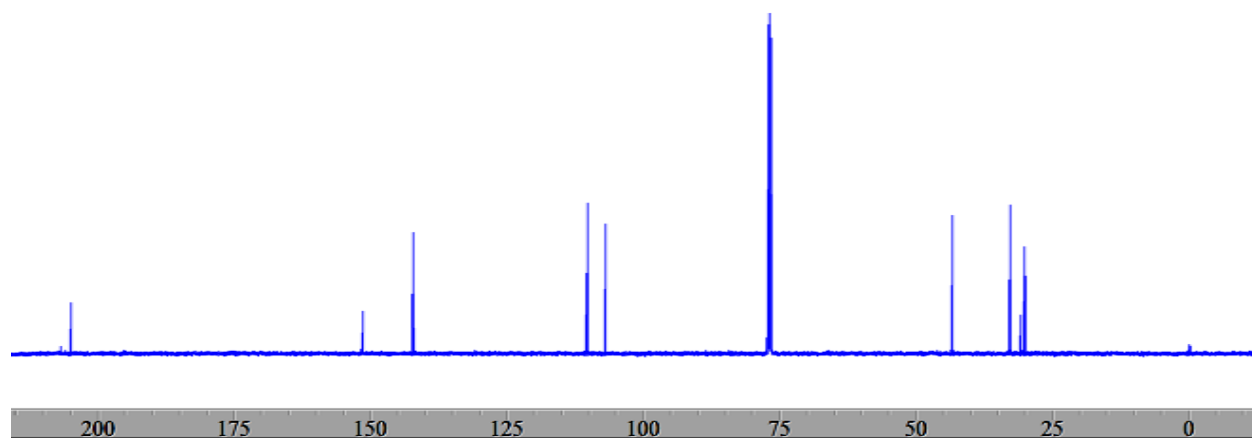

$^1\text{H}$  NMR spectra of **15d**

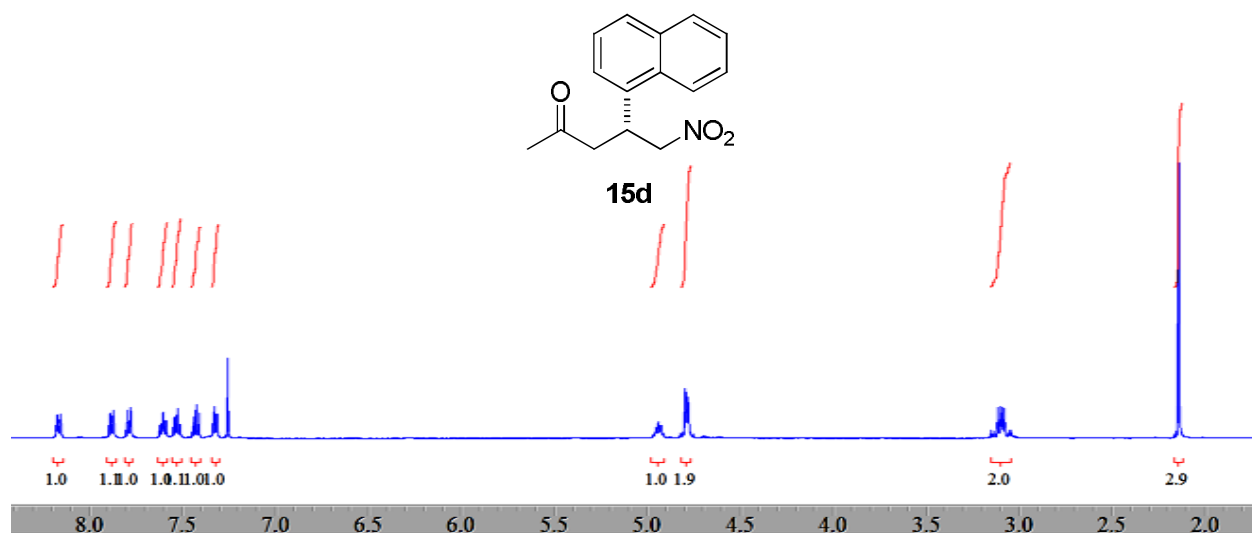

$^{13}\text{C}$  NMR spectra of **15d**

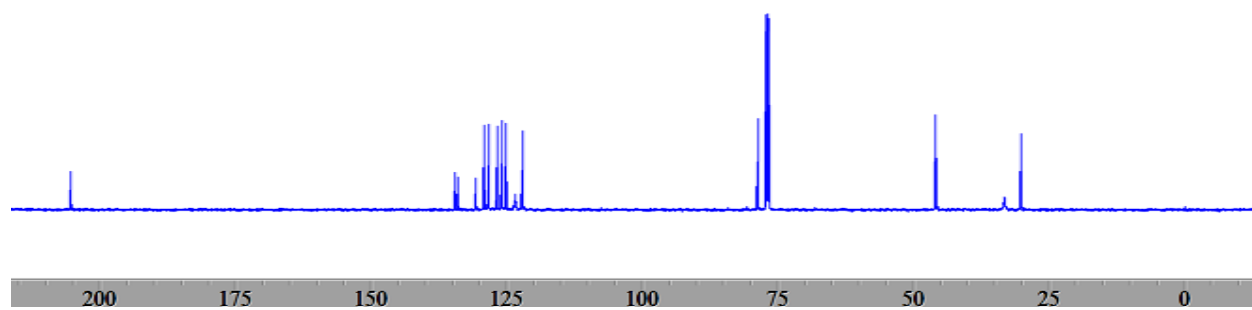

$^1\text{H}$  NMR spectra of **15e**

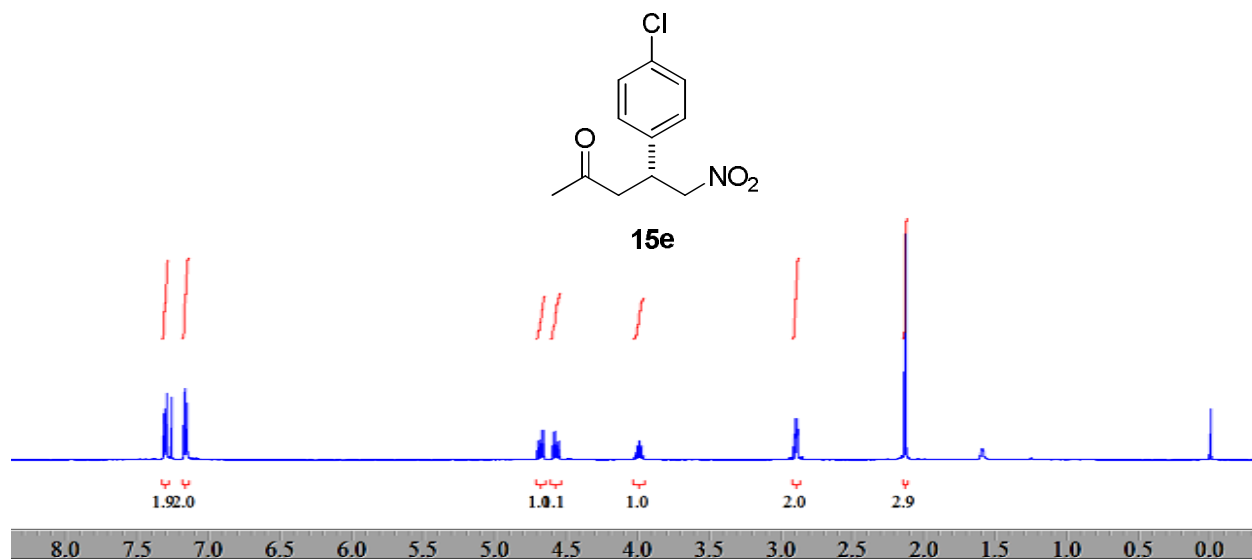

$^{13}\text{C}$  NMR spectra of **15e**

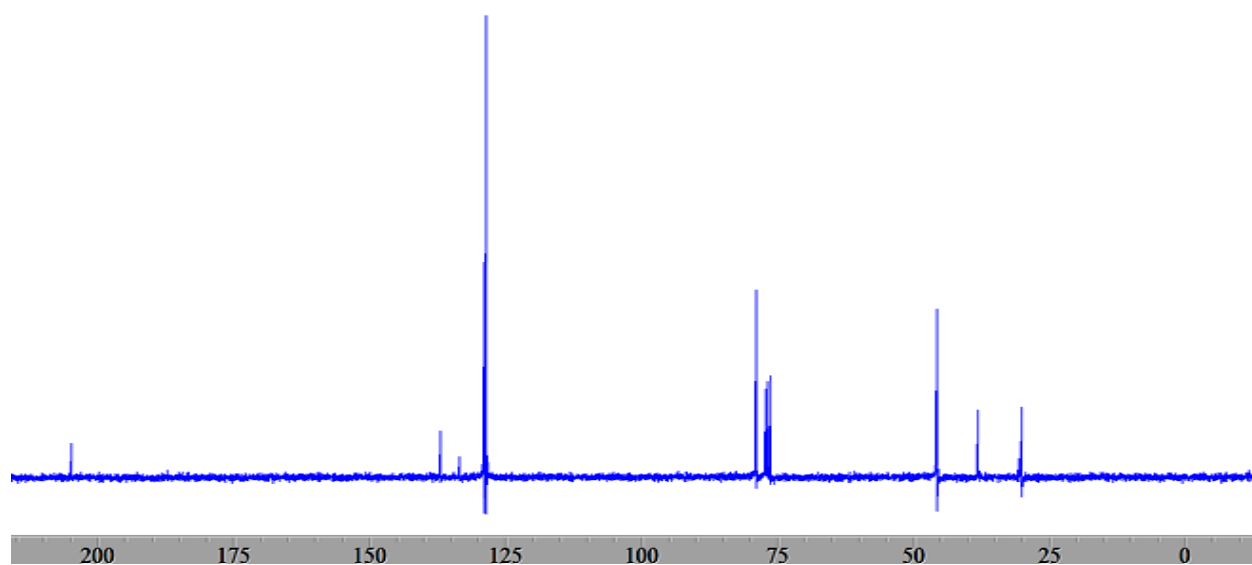

$^1\text{H}$  NMR spectra of **15f**

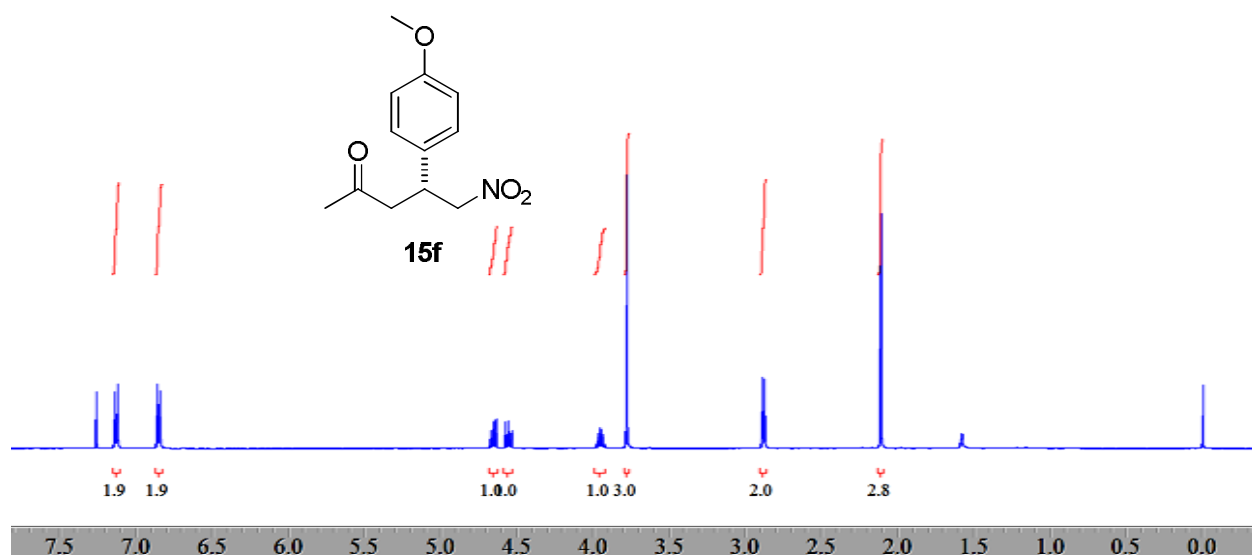

$^{13}\text{C}$  NMR spectra of **15f**

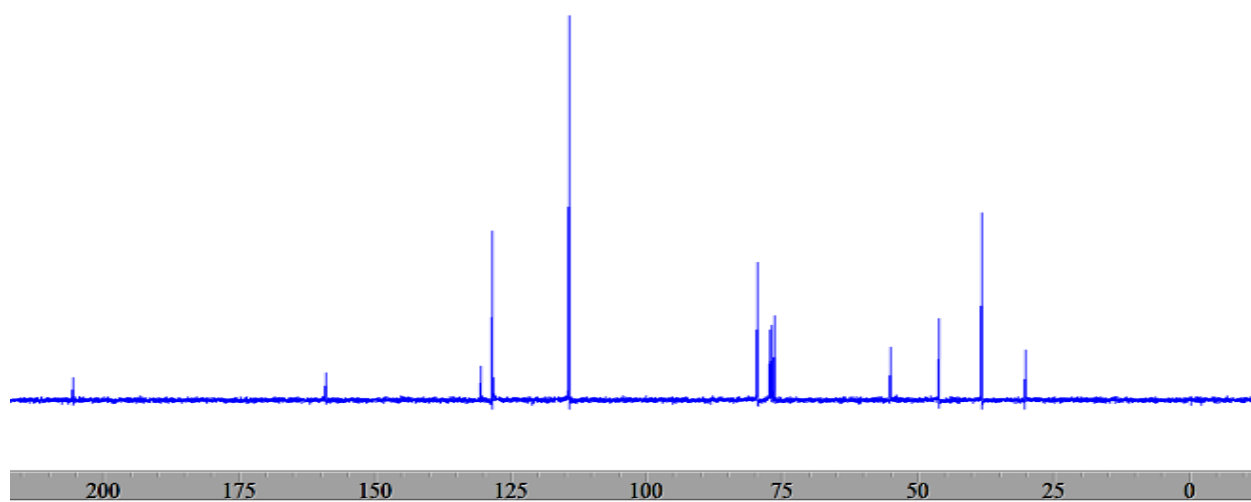

$^1\text{H}$  NMR spectra of **15g**

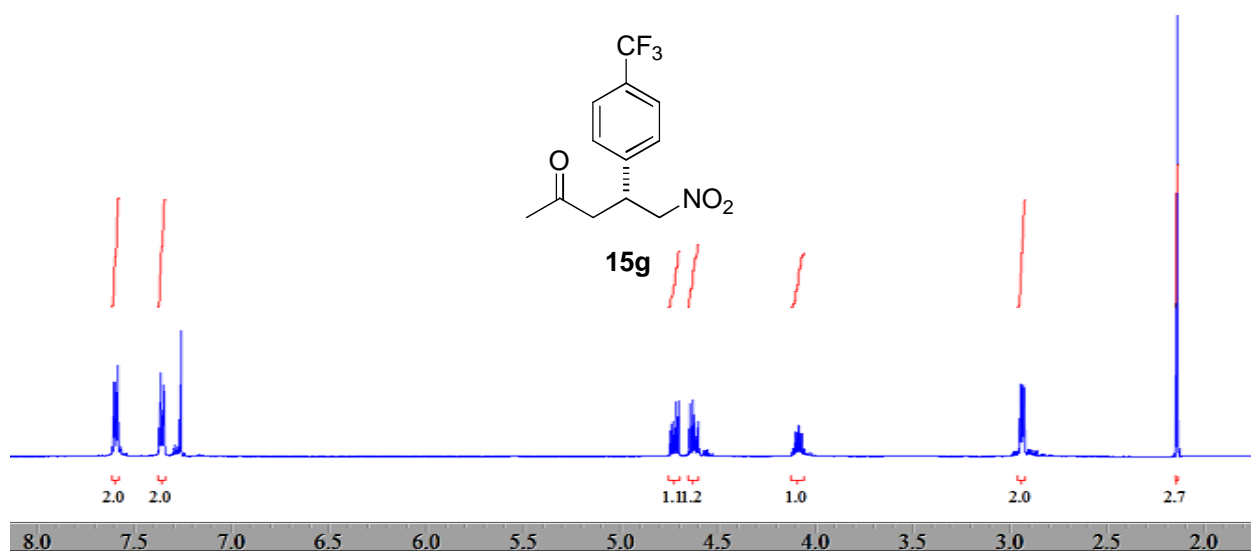

$^{13}\text{C}$  NMR spectra of **15g**

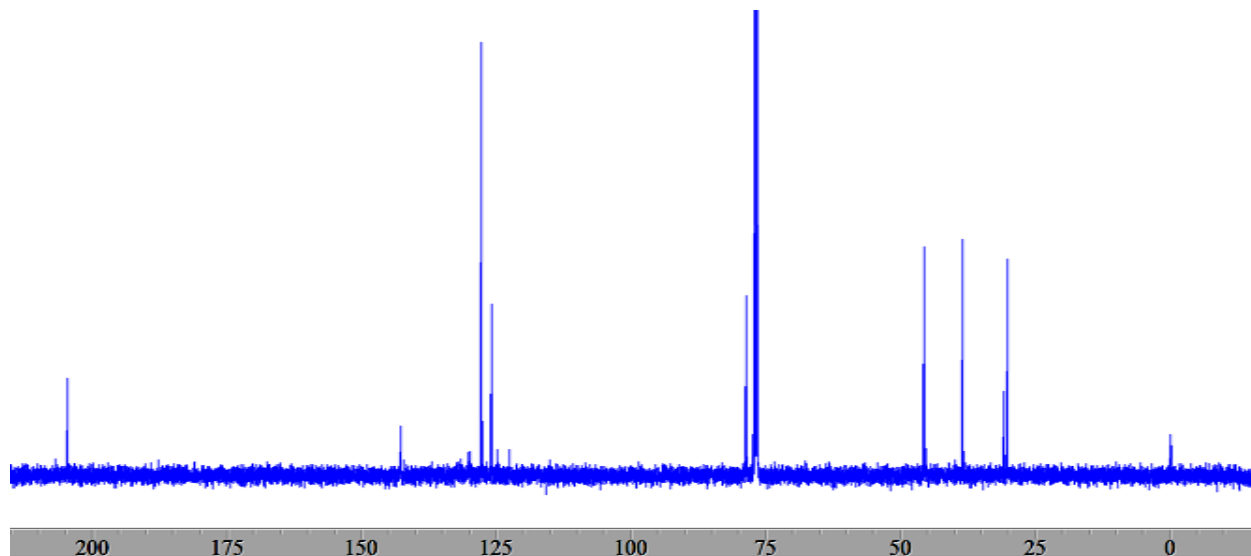

HPLC chromatogram of **13a**

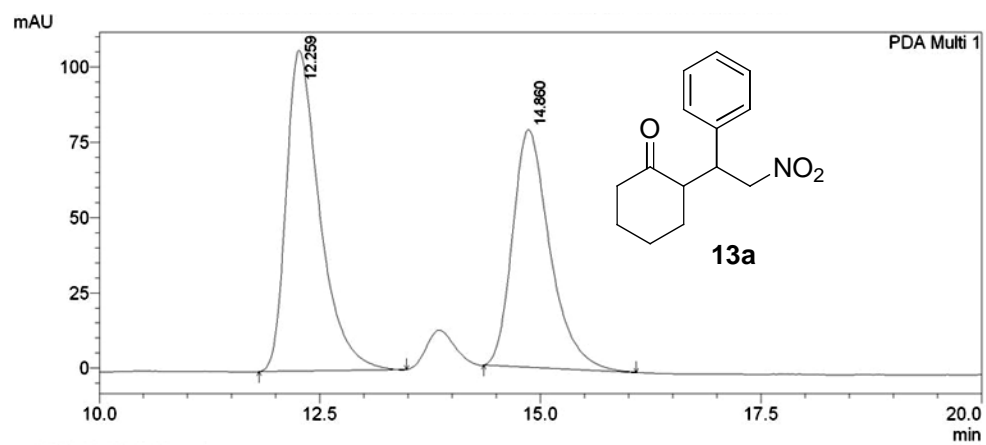



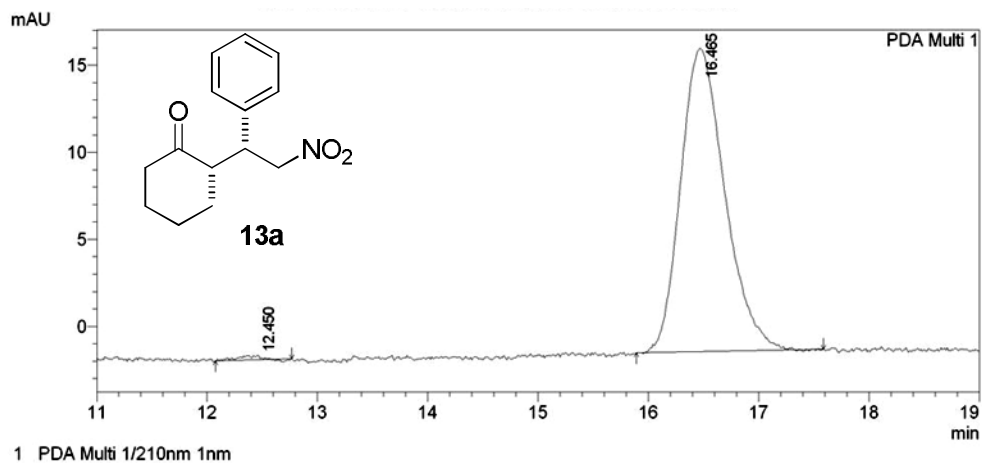

PeakTable

| Peak# | Name      | Ret. Time | Area   | Height | Area %  |
|-------|-----------|-----------|--------|--------|---------|
| 1     | RT:12.450 | 12.450    | 3166   | 255    | 0.649   |
| 2     | RT:16.465 | 16.465    | 484798 | 17430  | 99.351  |
| Total |           |           | 487964 | 17685  | 100.000 |

### HPLC chromatogram of 13b

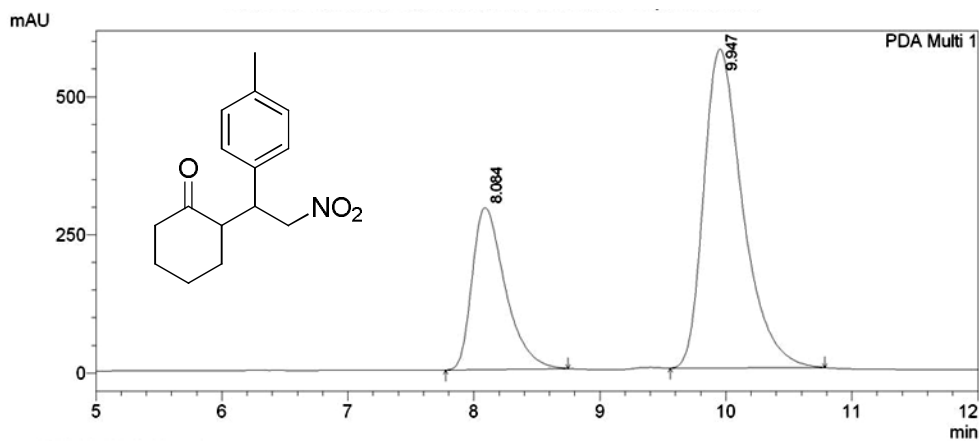

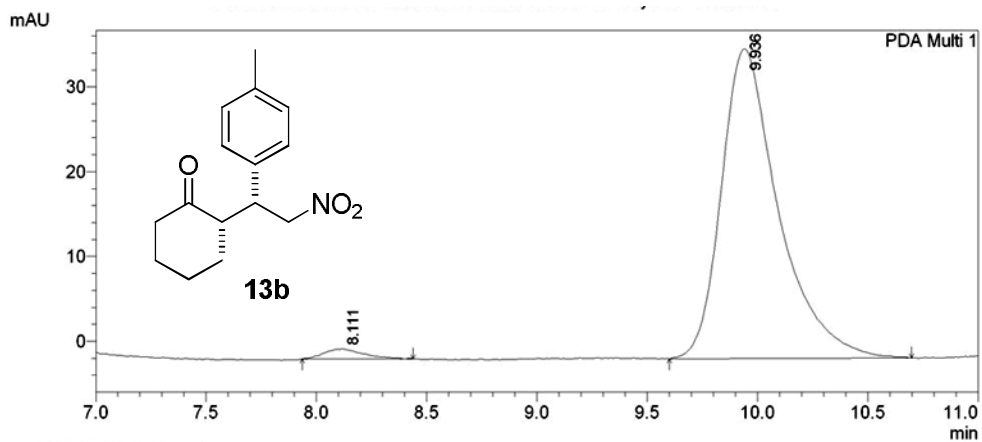

<Results>

PDA

PeakTable

| Peak# | Name | Ret. Time | Area   | Height | Area %  |
|-------|------|-----------|--------|--------|---------|
| 1     |      | 8.111     | 14883  | 1179   | 2.213   |
| 2     |      | 9.936     | 657654 | 36536  | 97.787  |
| Total |      |           | 672537 | 37715  | 100.000 |

### HPLC chromatogram of 13c

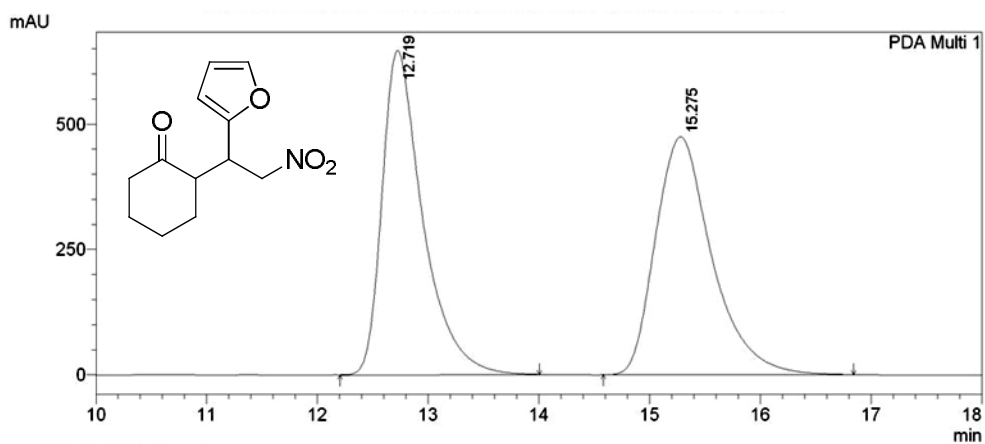

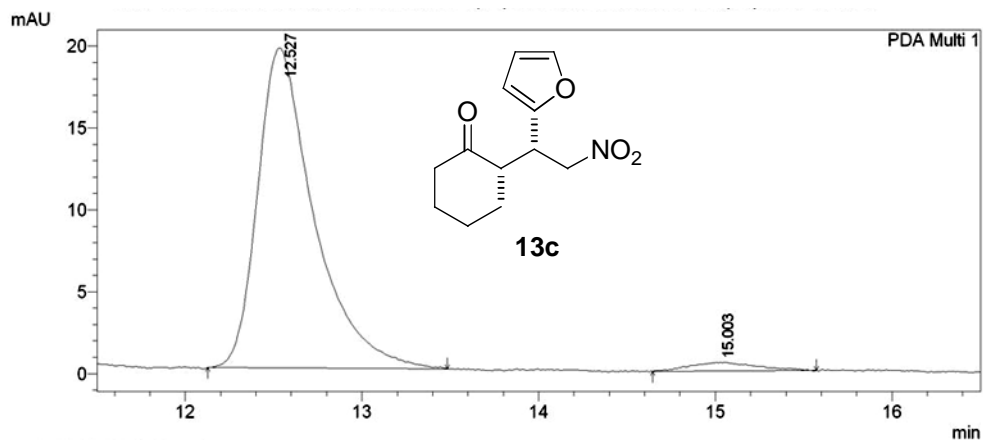

<Results>

PDA

PeakTable

PDA Ch1 210nm 4nm

| Peak# | Name | Ret. Time | Area   | Height | Area %  |
|-------|------|-----------|--------|--------|---------|
| 1     |      | 12.527    | 434299 | 19529  | 96.976  |
| 2     |      | 15.003    | 13542  | 523    | 3.024   |
| Total |      |           | 447841 | 20052  | 100.000 |

### HPLC chromatogram of 13d

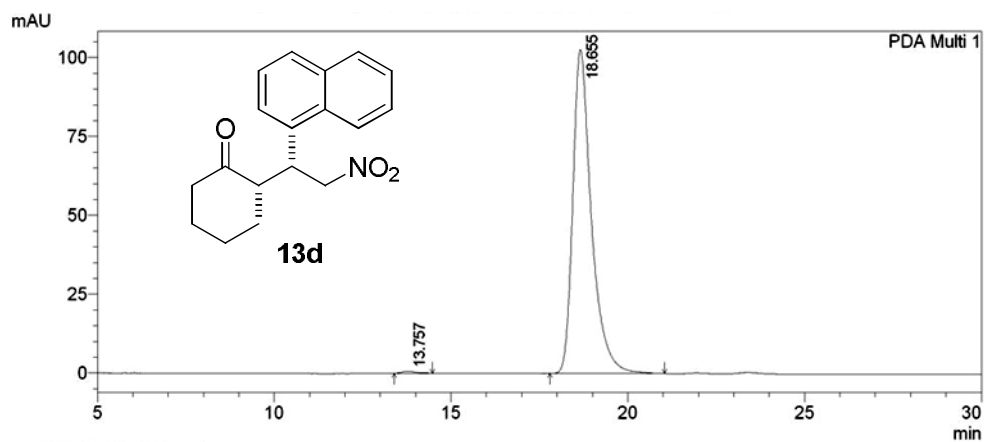

<Results>

PDA

PeakTable

PDA Ch1 220nm 4nm

| Peak# | Name | Ret. Time | Area    | Height | Area %  |
|-------|------|-----------|---------|--------|---------|
| 1     |      | 13.757    | 15997   | 652    | 0.423   |
| 2     |      | 18.655    | 3767220 | 102698 | 99.577  |
| Total |      |           | 3783217 | 103350 | 100.000 |

### HPLC chromatogram of **13e**

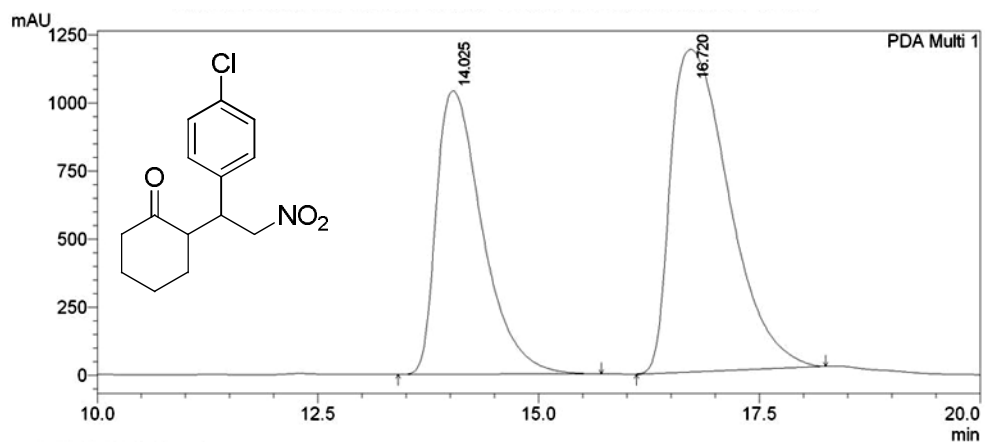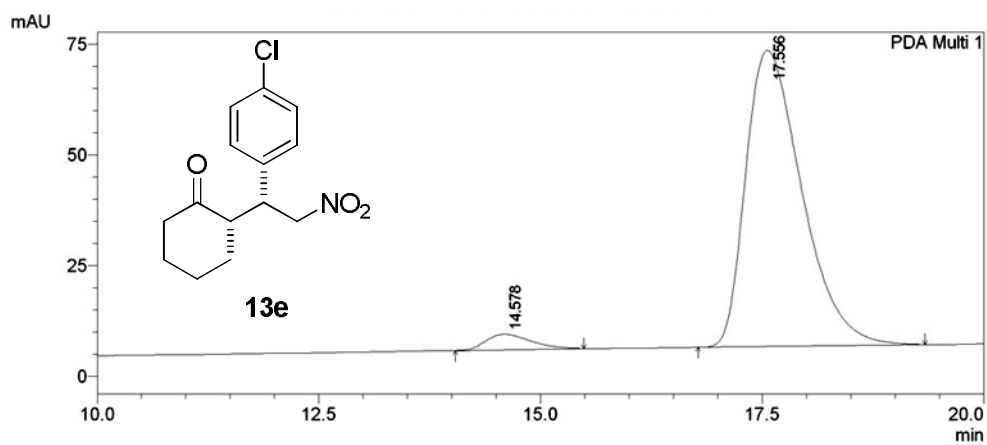

**<Results>**

PDA

PeakTable

PDA Ch1 254nm 4nm

| Peak# | Name | Ret. Time | Area    | Height | Area %  |
|-------|------|-----------|---------|--------|---------|
| 1     |      | 14.578    | 121939  | 3488   | 3.967   |
| 2     |      | 17.556    | 2951532 | 66880  | 96.033  |
| Total |      |           | 3073471 | 70368  | 100.000 |

# HPLC chromatogram of 13f

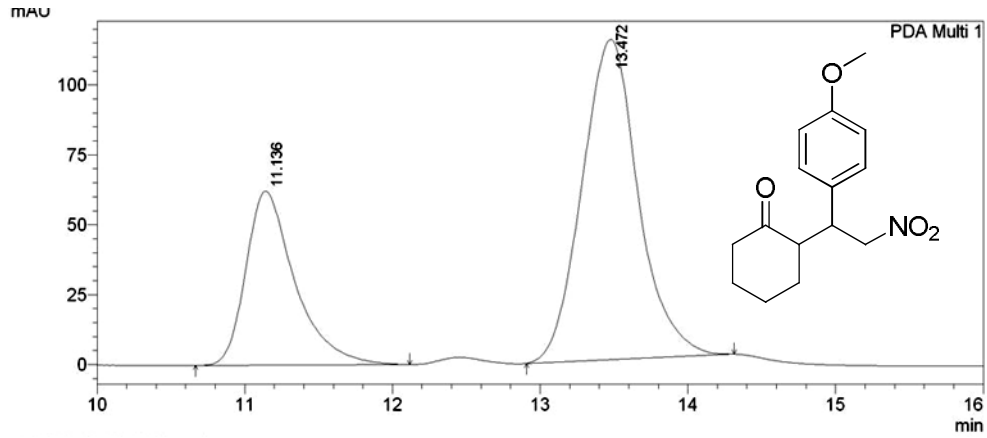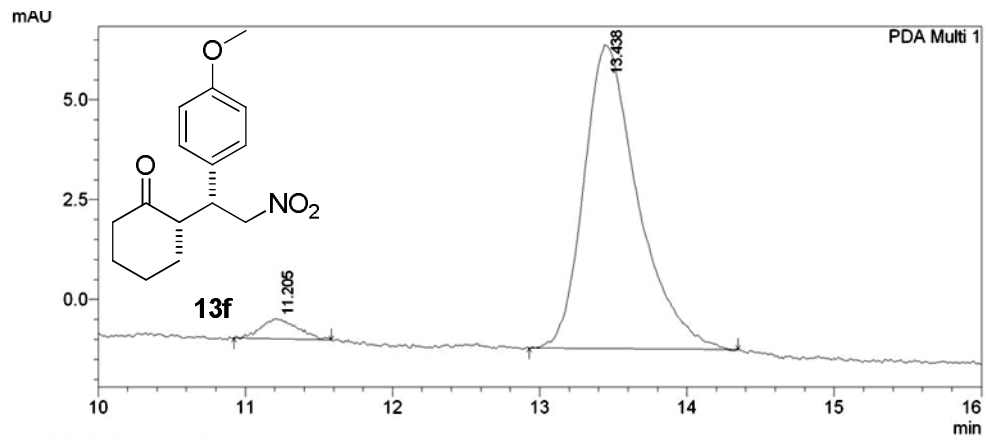

1 PDA Multi 1/210nm 4nm

## <Results>

PDA

PeakTable

PDA Ch1 210nm 4nm

| Peak# | Name | Ret. Time | Area   | Height | Area %  |
|-------|------|-----------|--------|--------|---------|
| 1     |      | 11.205    | 8512   | 499    | 4.213   |
| 2     |      | 13.438    | 193543 | 7606   | 95.787  |
| Total |      |           | 202056 | 8104   | 100.000 |

## HPLC chromatogram of 13g

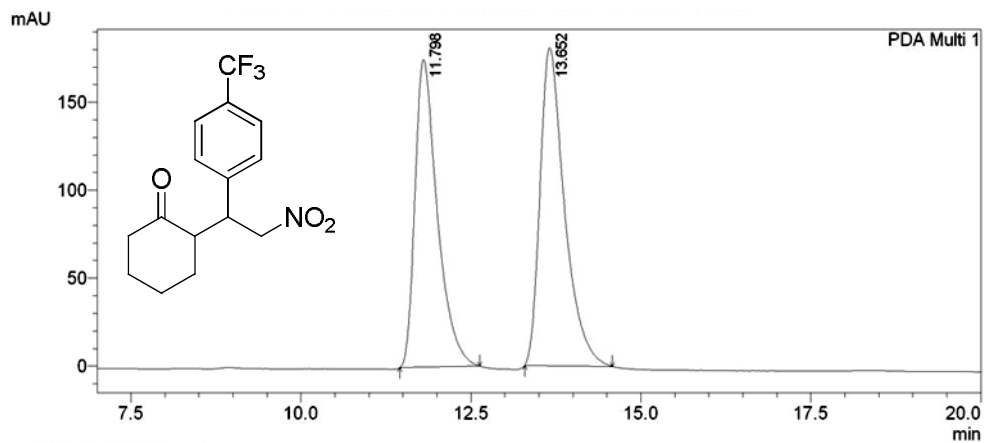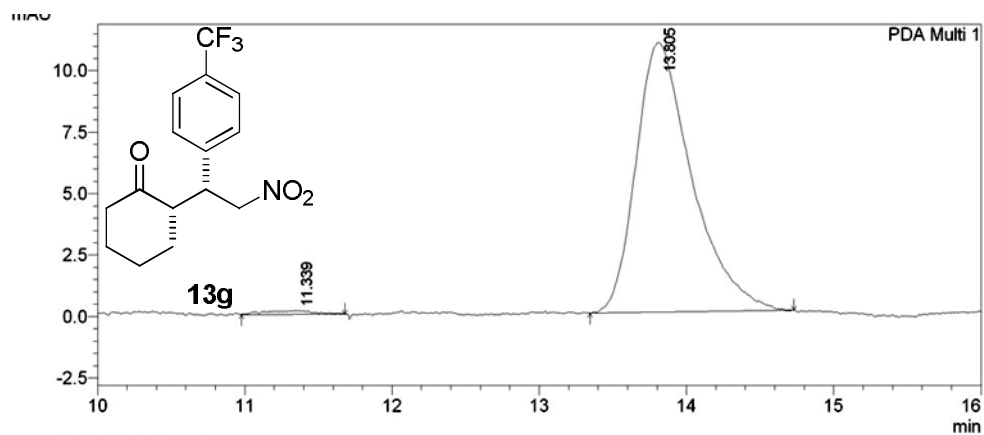

1 PDA Multi 1/210nm 4nm

### <Results>

PDA

PeakTable

PDA Ch1 210nm 4nm

| Peak# | Name | Ret. Time | Area   | Height | Area %  |
|-------|------|-----------|--------|--------|---------|
| 1     |      | 11.339    | 3584   | 152    | 1.224   |
| 2     |      | 13.805    | 289261 | 10957  | 98.776  |
| Total |      |           | 292846 | 11109  | 100.000 |

## HPLC chromatogram of 13h

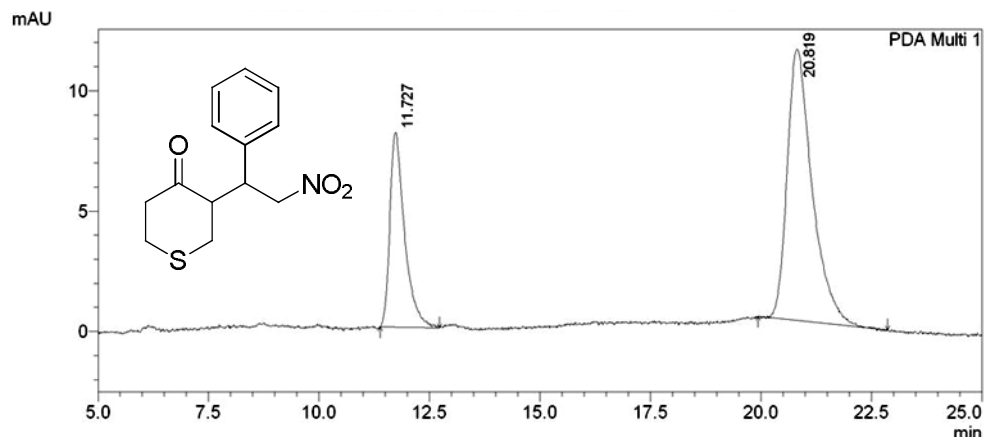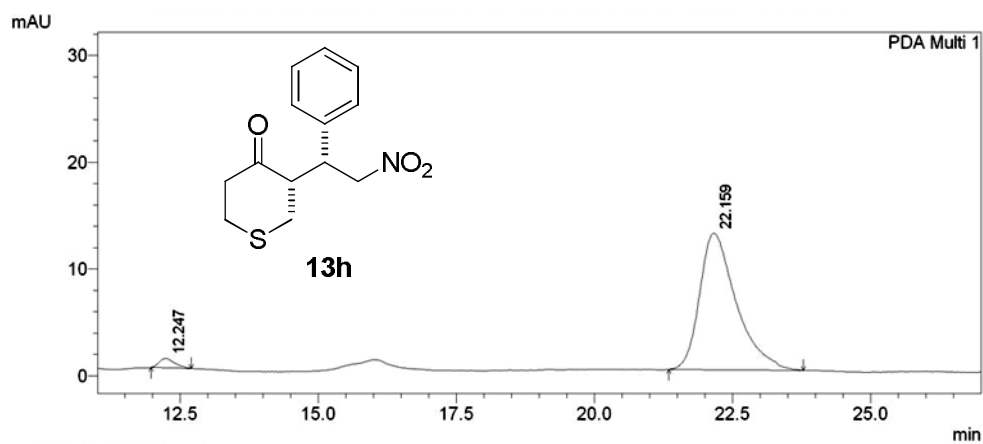

1 PDA Multi 1/254nm 4nm

### <Results>

PDA

PeakTable

PDA Ch1 254nm 4nm

| Peak# | Name | Ret. Time | Area   | Height | Area %  |
|-------|------|-----------|--------|--------|---------|
| 1     |      | 12.247    | 16999  | 883    | 2.795   |
| 2     |      | 22.159    | 591209 | 12806  | 97.205  |
| Total |      |           | 608208 | 13689  | 100.000 |

### HPLC chromatogram of **13i**

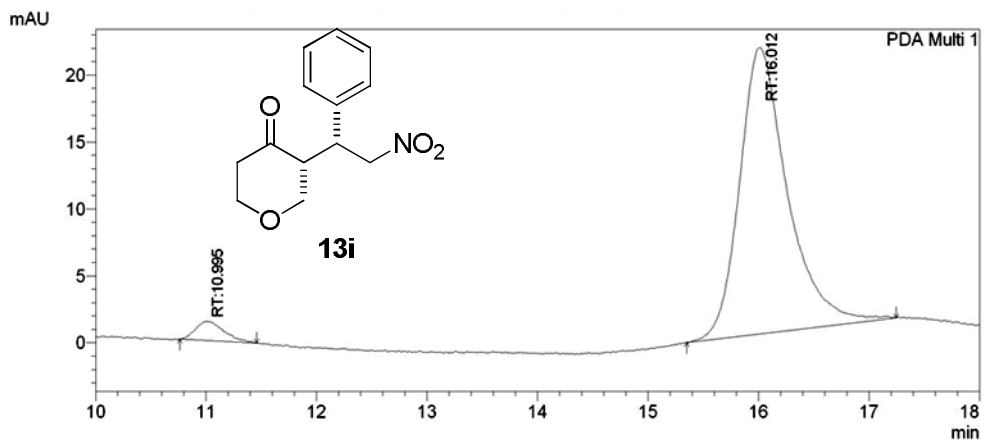

PeakTable

| Peak# | Name      | Ret. Time | Area   | Height | Area %  |
|-------|-----------|-----------|--------|--------|---------|
| 1     | RT:10.995 | 10.995    | 25388  | 1430   | 3.779   |
| 2     | RT:16.012 | 16.012    | 646435 | 21379  | 96.221  |
| Total |           |           | 671823 | 22809  | 100.000 |

### HPLC chromatogram of **13j**

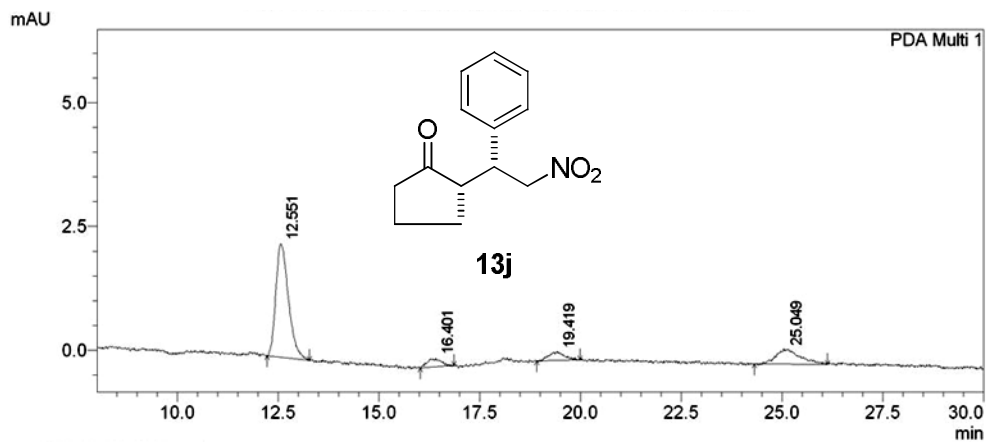

<Results>

PDA

PeakTable

| Peak# | Name | Ret. Time | Area  | Height | Area %  |
|-------|------|-----------|-------|--------|---------|
| 1     |      | 12.551    | 49929 | 2284   | 70.398  |
| 2     |      | 16.401    | 4012  | 172    | 5.656   |
| 3     |      | 19.419    | 4728  | 191    | 6.666   |
| 4     |      | 25.049    | 12255 | 307    | 17.280  |
| Total |      |           | 70923 | 2954   | 100.000 |



### HPLC chromatogram of **15a**

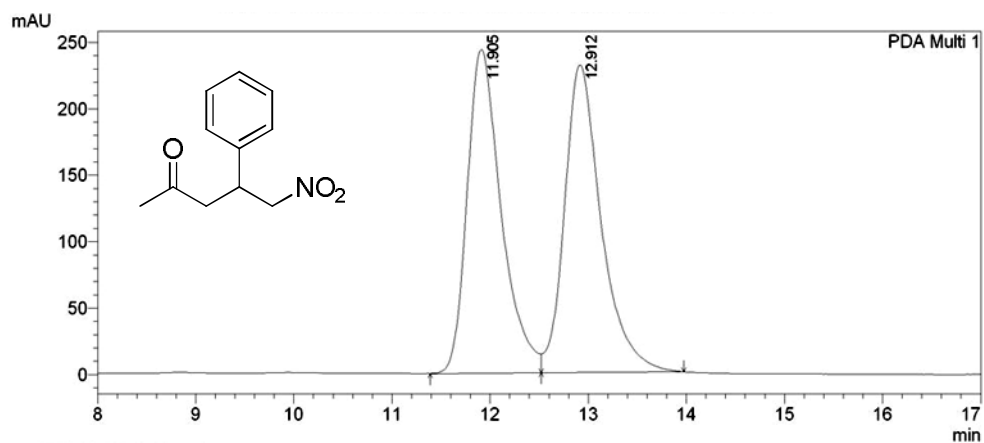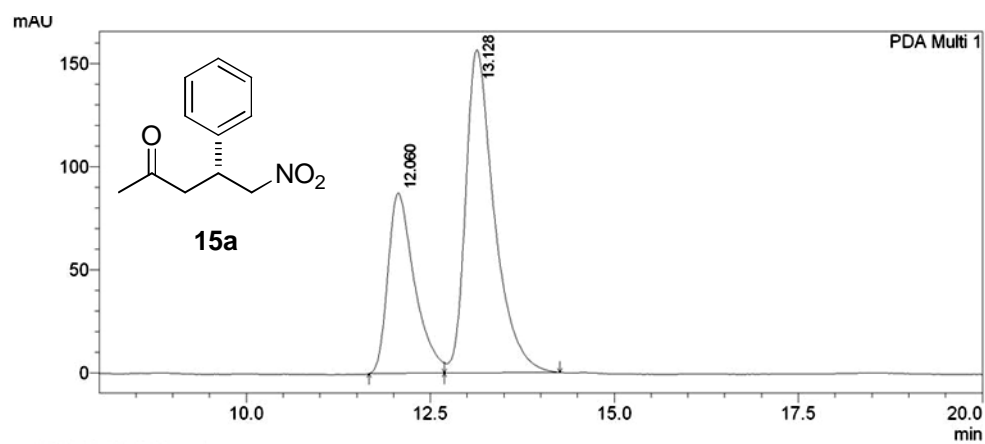

1 PDA Multi 1/210nm 4nm

#### <Results>

PDA

PeakTable

PDA Ch1 210nm 4nm

| Peak# | Name | Ret. Time | Area    | Height | Area %  |
|-------|------|-----------|---------|--------|---------|
| 1     |      | 12.060    | 2195786 | 87476  | 34.049  |
| 2     |      | 13.128    | 4253199 | 156817 | 65.951  |
| Total |      |           | 6448986 | 244293 | 100.000 |

### HPLC chromatogram of **15b**

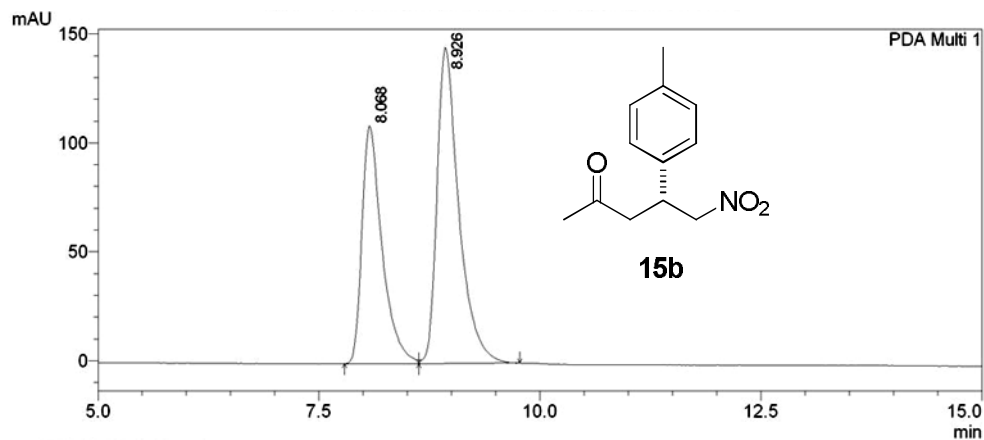

**<Results>**

PDA

PeakTable

| Peak# | Name | Ret. Time | Area    | Height | Area %  |
|-------|------|-----------|---------|--------|---------|
| 1     |      | 8.068     | 1731104 | 109168 | 40.974  |
| 2     |      | 8.926     | 2493798 | 144962 | 59.026  |
| Total |      |           | 4224902 | 254130 | 100.000 |

### HPLC chromatogram of **15c**

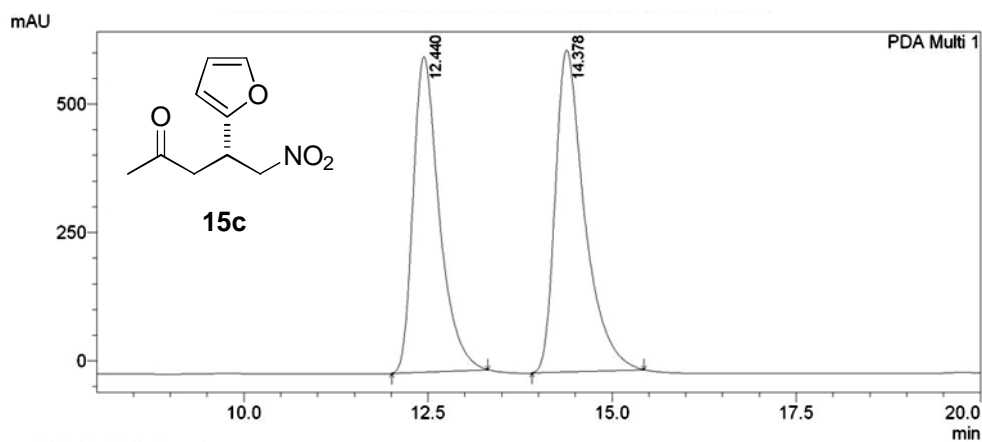

**<Results>**

PDA

PeakTable

| Peak# | Name | Ret. Time | Area     | Height  | Area %  |
|-------|------|-----------|----------|---------|---------|
| 1     |      | 12.440    | 15179118 | 613327  | 46.632  |
| 2     |      | 14.378    | 17371713 | 626528  | 53.368  |
| Total |      |           | 32550832 | 1239854 | 100.000 |

## HPLC chromatogram of **15d**

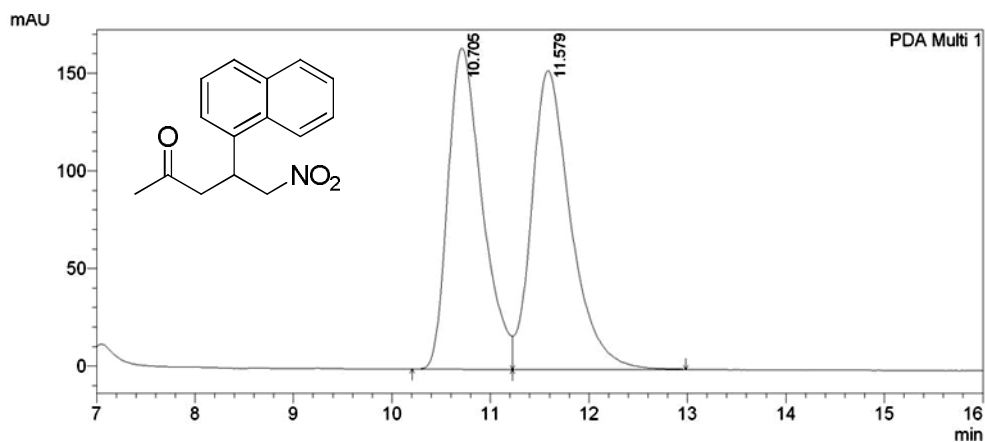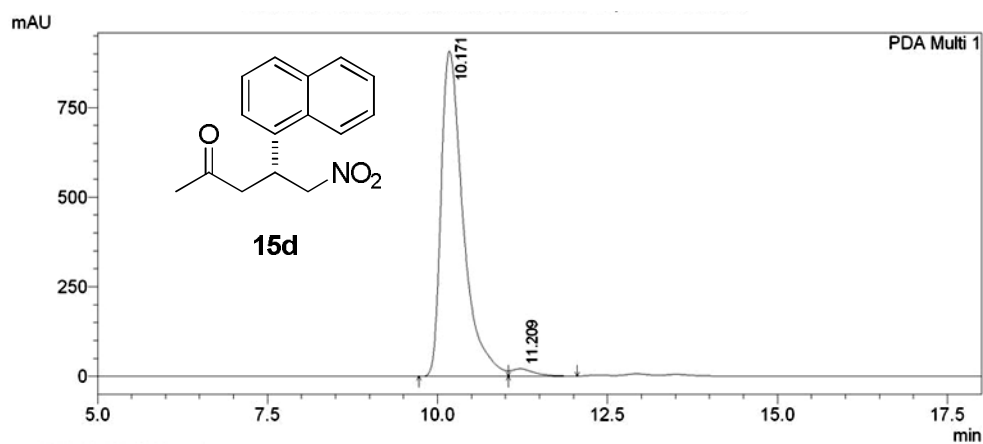

1 PDA Multi 1/220nm 4nm

### <Results>

PDA

PeakTable

PDA Ch1 220nm 4nm

| Peak# | Name | Ret. Time | Area     | Height | Area %  |
|-------|------|-----------|----------|--------|---------|
| 1     |      | 10.171    | 20462248 | 906683 | 97.704  |
| 2     |      | 11.209    | 480799   | 20937  | 2.296   |
| Total |      |           | 20943048 | 927620 | 100.000 |

### HPLC chromatogram of 15e

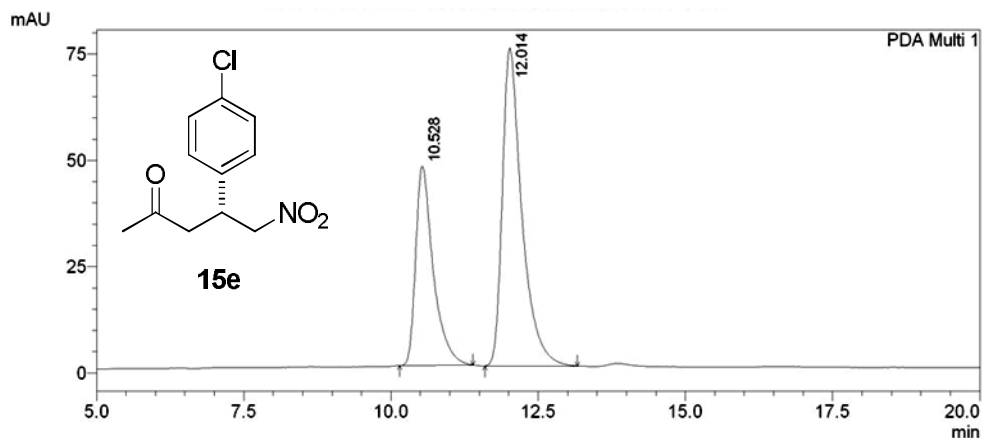

**<Results>**

PDA

PeakTable

| Peak# | Name | Ret. Time | Area    | Height | Area %  |
|-------|------|-----------|---------|--------|---------|
| 1     |      | 10.528    | 966509  | 46830  | 35.892  |
| 2     |      | 12.014    | 1726330 | 74745  | 64.108  |
| Total |      |           | 2692839 | 121575 | 100.000 |

### HPLC chromatogram of 15f

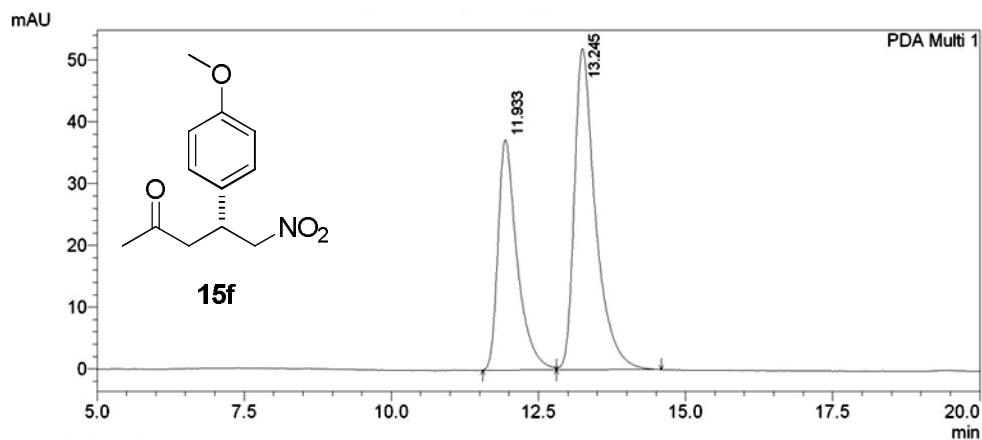

**<Results>**

PDA

PeakTable

| Peak# | Name | Ret. Time | Area    | Height | Area %  |
|-------|------|-----------|---------|--------|---------|
| 1     |      | 11.933    | 843849  | 37324  | 39.299  |
| 2     |      | 13.245    | 1303399 | 52017  | 60.701  |
| Total |      |           | 2147248 | 89341  | 100.000 |

# HPLC chromatogram of 15g

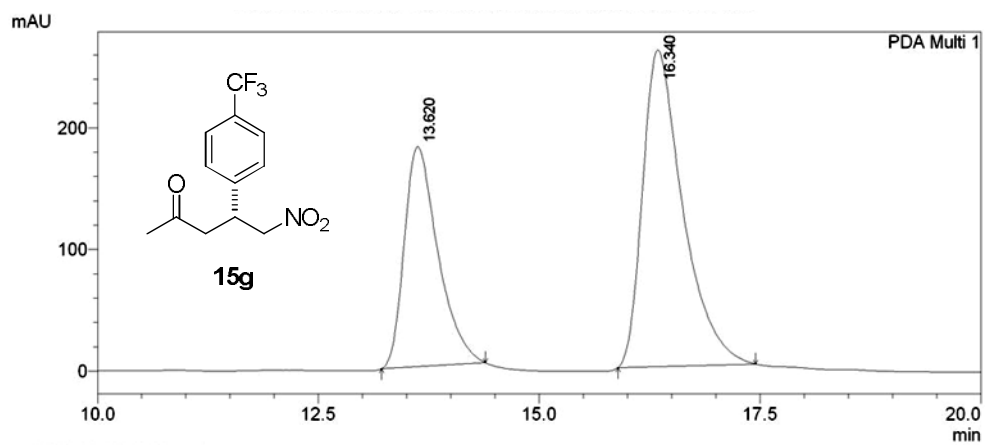

## Results>

DA

PDA Ch1 210nm 4nm

PeakTable

| Peak# | Name | Ret. Time | Area     | Height | Area %  |
|-------|------|-----------|----------|--------|---------|
| 1     |      | 13.620    | 4804870  | 180827 | 36.760  |
| 2     |      | 16.340    | 8266018  | 259964 | 63.240  |
| Total |      |           | 13070888 | 440791 | 100.000 |
